# Supplementary material for: Palladium-catalyzed Heck cyclization/allylation with homoallyl alcoholsviaretro-allylation
Source: Royal Society of Chemistry journal article supplement (doi:10.1039/d2qo00655c), 2022-01-01

# Palladium-Catalyzed Heck Cyclization/Allylation with Homoallyl Alcohols via Retro-Allylation

Ping-Xin Zhou,<sup>\*a</sup> Xiaozhe Yang,<sup>a</sup> Xueyan Du,<sup>a</sup> Shujie Zhao,<sup>a</sup> Han Wang,<sup>a</sup> Xinguang Li,<sup>a</sup> Ning  
Liu,<sup>a</sup> Xinqiang Tan,<sup>\*a</sup> Feng Ren<sup>\*ab</sup> and Yong-Min Liang<sup>c</sup>

<sup>a</sup>*School of Basic Medical Sciences, Xinxiang Medical University, Xinxiang, China*

<sup>b</sup>*Henan International Joint Laboratory of Immunity and Targeted Therapy for liver-intestinal Tumors, Xinxiang  
Medical University, Xinxiang, China*

<sup>c</sup>*State Key Laboratory of Applied Organic Chemistry, Lanzhou University, Lanzhou, China;*

*E-mail: zhoupingxin518@163.com, tanxq@xxmu.edu.cn and 1215377283@qq.com*

## Table of Contents

|   |                                                                |    |
|---|----------------------------------------------------------------|----|
| 1 | General remarks                                                | 2  |
| 2 | General procedure for the preparation of the products <b>3</b> | 2  |
| 3 | Spectral data of compound <b>3</b>                             | 2  |
| 4 | References                                                     | 12 |
| 5 | The crystal structure of product <b>3-22</b>                   | 12 |
| 6 | <sup>1</sup> H, <sup>13</sup> C spectra for compound <b>3</b>  | 14 |

## 1. General remarks

The desired product was purified by flash column chromatography, silica gel (200~300 mesh).  $^1\text{H}$  NMR spectra and  $^{13}\text{C}$  NMR spectra were recorded on 400 MHz in  $\text{CDCl}_3$  and TMS as internal standard. All products were further characterized by HRMS (high resolution mass spectra). Copies of their  $^1\text{H}$  NMR and  $^{13}\text{C}$  NMR spectra are provided. All solvents were dried and distilled according to standard procedures. Commercially available reagents and solvents were used without further purification. Compound **1** was synthesized according to the literature procedure.<sup>1</sup> For homoallyl alcohol **2** was prepared based on reported procedures and NMR data have matched to literatures.<sup>2</sup> All reactions were heated by oil bath. HRMS analysis of compounds was performed with a time-of-flight mass spectrometer (micrOTOF-Q, Bruker Daltonik, Germany).

## 2. General procedure for the preparation of the products **3**

An oven-dried Schlenk tube under a nitrogen atmosphere was charged aryl iodide-tethered alkene **1** (0.3 mmol, 1.0 equiv) and homoallyl alcohol **2** (0.6 mmol, 2.0 equiv),  $\text{Pd}_2(\text{dba})_3$  (5 mol %),  $\text{P}(p\text{-Me-C}_6\text{H}_4)_3$  (20 mol%),  $\text{Cs}_2\text{CO}_3$  (0.30 mmol, 1.5 equiv), toluene (1.5 mL). The mixture was stirred at 35 °C for 30 mins and then stirred at 110 °C for 24 h. The resulting mixture was cooled to room temperature and filtered through Celite eluting with EtOAc. The volatiles were evaporated under reduced pressure and the residue was purified by silica gel flash chromatography to afford the desired products **3**.

## 3. Spectral data of compound **3**

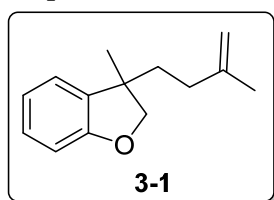

**3-methyl-3-(3-methylbut-3-en-1-yl)-2,3-dihydrobenzofuran: Colorless oil;**  $^1\text{H}$  NMR(400MHz,  $\text{CDCl}_3$ )  $\delta$ : 7.08-7.00(m, 2H), 6.83-6.79(m, 1H), 6.71(d,  $J=8.0\text{Hz}$ , 1H), 4.59(d,  $J=11.2\text{Hz}$ , 2H), 4.30(d,  $J=8.4\text{Hz}$ , 1H), 4.10(d,  $J=8.4\text{Hz}$ , 1H), 2.01-1.92(m, 1H), 1.74-1.65(m, 3H), 1.61(s, 3H), 1.29(s, 3H);  $^{13}\text{C}$  NMR(100MHz,  $\text{CDCl}_3$ )  $\delta$ : 159.5, 145.7, 134.9, 128.0, 122.8, 120.5, 109.7, 109.6, 82.3, 45.1, 38.9, 32.7, 25.7, 22.7; MS (EI):  $m/z$ (%) 202 (75)  $[\text{M}]^+$ , 133(100), 105(100), 77(36).

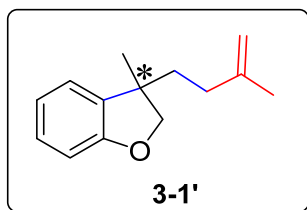

The ee value (87% ee) of **3-1'** was determined by chiral HPLC analysis: OJ-H Column Column (254 mm); detected at 254 nm; n-hexane/i-propanol = 95/5; flow = 1 ml/min; Retention time: 5.8 min (major), 6.5 min (minor).

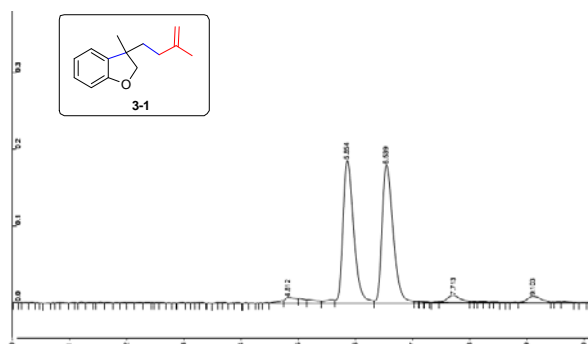

| Peak No       | Peak Name | Result (ug/ml)  | Ret. Time (min) | Time Offset (min) | Width 1/2 (sec) | Area (counts)   |
|---------------|-----------|-----------------|-----------------|-------------------|-----------------|-----------------|
| 1             |           | 1.8474          | 4.812           | 0.000             | 6.7             | 1012637         |
| 2             |           | 44.5376         | 5.854           | 0.000             | 11.7            | 24413510        |
| 3             |           | 48.2684         | 6.539           | 0.000             | 12.2            | 26458618        |
| 4             |           | 2.6898          | 7.713           | 0.000             | 0.0             | 1474435         |
| 5             |           | 2.6568          | 9.103           | 0.000             | 0.0             | 1456345         |
| <b>Totals</b> |           | <b>100.0000</b> |                 | <b>0.000</b>      |                 | <b>54815564</b> |

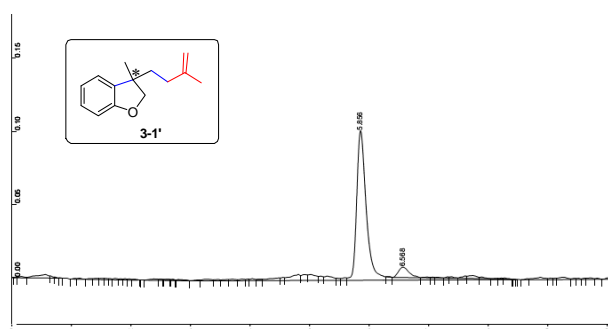

| Peak No       | Peak Name | Result (ug/ml)  | Ret. Time (min) | Time Offset (min) | Width 1/2 (sec) | Area (counts)   |
|---------------|-----------|-----------------|-----------------|-------------------|-----------------|-----------------|
| 1             |           | 93.6601         | 5.836           | 0.000             | 9.6             | 12793603        |
| 2             |           | 6.3399          | 6.568           | 0.000             | 0.0             | 866003          |
| <b>Totals</b> |           | <b>100.0000</b> |                 | <b>0.000</b>      |                 | <b>13659606</b> |

**3,5-dimethyl-3-(3-methylbut-3-en-1-yl)-2,3-dihydrobenzofuran: Colorless oil;**  $^1\text{H}$  NMR(400MHz,  $\text{CDCl}_3$ )  $\delta$ : 6.84(d,  $J=8.0\text{Hz}$ , 1H), 6.80(s, 1H), 6.60(d,  $J=8.0\text{Hz}$ , 1H), 4.59(d,  $J=10.0\text{Hz}$ , 2H), 4.27(d,  $J=8.8\text{Hz}$ , 1H), 4.07(d,  $J=8.8\text{Hz}$ , 1H), 2.22(s, 3H), 2.01-1.93(m, 1H), 1.76-1.64(m, 3H), 1.62(s, 3H), 1.27(s, 3H);  $^{13}\text{C}$  NMR(100MHz,  $\text{CDCl}_3$ )  $\delta$ : 157.4, 145.7, 135.0, 129.7, 128.4, 123.3, 109.6, 109.1, 82.4, 45.1, 38.8, 32.7, 25.5, 22.7, 20.9; MS (EI):  $m/z$ (%) 216 (87)  $[\text{M}]^+$ , 147(100), 119(100), 91(42).

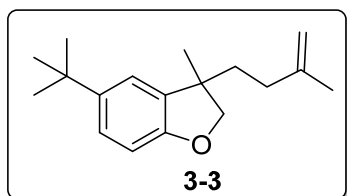

**5-(tert-butyl)-3-methyl-3-(3-methylbut-3-en-1-yl)-2,3-dihydrobenzofuran: Colorless oil;**  $^1\text{H}$  NMR(400MHz,  $\text{CDCl}_3$ )  $\delta$ : 7.09-7.06(m, 1H), 7.01(d,  $J=2.0\text{Hz}$ , 1H), 6.63(d,  $J=8.4\text{Hz}$ , 1H), 4.58(d,  $J=9.6\text{Hz}$ , 2H), 4.28(d,  $J=8.8\text{Hz}$ , 1H), 4.08(d,  $J=8.8\text{Hz}$ , 1H), 2.02-1.95(m, 1H), 1.75-1.65(m, 3H),

1.61(s, 3H), 1.28(s, 3H), 1.23(s, 9H);  $^{13}\text{C}$  NMR(100MHz,  $\text{CDCl}_3$ )  $\delta$ : 157.2, 145.8, 143.5, 134.6, 124.7, 119.6, 109.7, 108.6, 82.5, 45.3, 38.9, 34.3, 32.8, 31.7, 25.4, 22.6; HRMS(APCI)  $m/z$ :  $[\text{M}+\text{H}]^+$  calcd for  $\text{C}_{18}\text{H}_{27}\text{O}$  259.2056; found 259.2057.

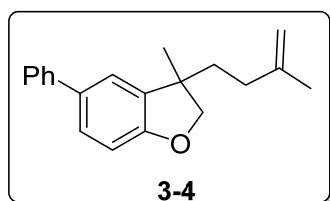

**3-methyl-3-(3-methylbut-3-en-1-yl)-5-phenyl-2,3-dihydrobenzofuran:** Colorless oil;  $^1\text{H}$  NMR(400MHz,  $\text{CDCl}_3$ )  $\delta$ : 7.47-7.45(m, 2H), 7.33-7.27(m, 3H), 7.22-7.18(m, 2H), 6.76(d,  $J=8.4\text{Hz}$ , 1H), 4.58(d,  $J=8.8\text{Hz}$ , 2H), 4.34(d,  $J=8.4\text{Hz}$ , 1H), 4.13(d,  $J=8.8\text{Hz}$ , 1H), 2.03-1.93(m, 1H), 1.77-1.69(m, 3H), 1.61(s, 3H), 1.32(s, 3H);  $^{13}\text{C}$  NMR(100MHz,  $\text{CDCl}_3$ )  $\delta$ : 159.2, 145.6, 141.4, 135.6, 134.1, 128.7, 127.1, 126.8, 126.5, 121.6, 109.8, 109.7, 82.7, 45.2, 38.9, 32.7, 25.6, 22.7; HRMS(APCI)  $m/z$ :  $[\text{M}+\text{H}]^+$  calcd for  $\text{C}_{20}\text{H}_{23}\text{O}$  279.1743; found 279.1742.

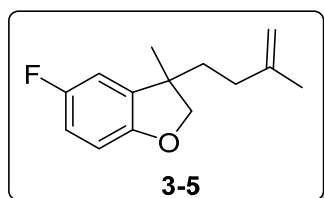

**5-fluoro-3-methyl-3-(3-methylbut-3-en-1-yl)-2,3-dihydrobenzofuran:** Colorless oil;  $^1\text{H}$  NMR(400MHz,  $\text{CDCl}_3$ )  $\delta$ : 6.75-6.69(m, 2H), 6.63-6.59(m, 1H), 4.59(d,  $J=14.8\text{Hz}$ , 2H), 4.31(d,  $J=8.8\text{Hz}$ , 1H), 4.11(d,  $J=8.8\text{Hz}$ , 1H), 2.01-1.94(m, 1H), 1.73-1.65(m, 3H), 1.62(s, 3H), 1.28(s, 3H);  $^{13}\text{C}$  NMR(100MHz,  $\text{CDCl}_3$ )  $\delta$ : 158.8, 156.4(d,  $J=109\text{Hz}$ ), 145.4, 136.5(d,  $J=7\text{Hz}$ ), 114.1(d,  $J=24\text{Hz}$ ), 110.0(d,  $J=24\text{Hz}$ ), 109.8, 109.7(d,  $J=9\text{Hz}$ ), 82.8, 45.5, 38.7, 32.6, 25.5, 22.7; HRMS(APCI)  $m/z$ :  $[\text{M}+\text{H}]^+$  calcd for  $\text{C}_{14}\text{H}_{18}\text{FO}$  221.1336; found 221.1334.

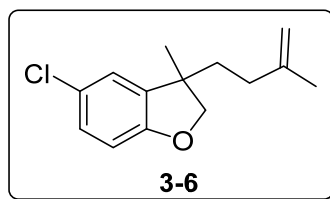

**5-chloro-3-methyl-3-(3-methylbut-3-en-1-yl)-2,3-dihydrobenzofuran:** Colorless oil;  $^1\text{H}$  NMR(400MHz,  $\text{CDCl}_3$ )  $\delta$ : 7.00(dd,  $J=2.4\text{Hz}$ , 8.4Hz, 1H), 6.95(d,  $J=2.0\text{Hz}$ , 1H), 6.62(d,  $J=8.4\text{Hz}$ , 1H), 4.60(d,  $J=15.2\text{Hz}$ , 2H), 4.32(d,  $J=8.2\text{Hz}$ , 1H), 4.11(d,  $J=8.8\text{Hz}$ , 1H), 1.99-1.93(m, 1H), 1.72-1.63(m, 3H), 1.62(s, 3H), 1.28(s, 3H);  $^{13}\text{C}$  NMR(100MHz,  $\text{CDCl}_3$ )  $\delta$ : 158.2, 145.3, 136.9, 127.9, 125.1, 123.1, 110.6, 109.9, 82.8, 45.4, 38.7, 32.5, 25.6, 22.7; HRMS(APCI)  $m/z$ :  $[\text{M}+\text{H}]^+$  calcd for  $\text{C}_{14}\text{H}_{18}\text{ClO}$  237.1041; found 237.1045.

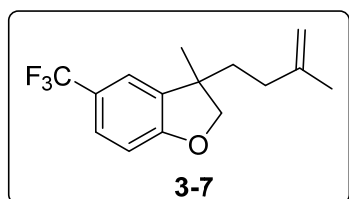

**3-methyl-3-(3-methylbut-3-en-1-yl)-5-(trifluoromethyl)-2,3-dihydrobenzofuran: NMR yield;**  
HRMS(APCI) m/z:  $[M+H]^+$  calcd for  $C_{15}H_{18}F_3O$  271.1304; found 271.1300.

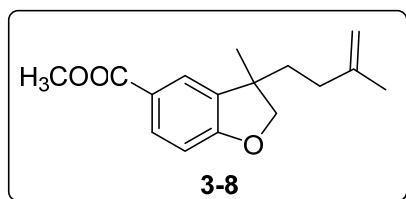

**methyl 3-methyl-3-(3-methylbut-3-en-1-yl)-2,3-dihydrobenzofuran-5-carboxylate: Colorless oil;**  $^1H$  NMR(400MHz,  $CDCl_3$ )  $\delta$ : 7.83-7.80(m, 1H), 7.70(d,  $J=1.6$ Hz, 1H), 6.71(d,  $J=8.4$ Hz, 1H), 4.58(d,  $J=14.4$ Hz, 2H), 4.38(d,  $J=8.8$ Hz, 1H), 4.17(d,  $J=8.8$ Hz, 1H), 3.80(s, 3H), 1.99-1.89(m, 1H), 1.72-1.65(m, 3H), 1.60(s, 3H), 1.31(s, 3H);  $^{13}C$  NMR(100MHz,  $CDCl_3$ )  $\delta$ : 166.9, 163.7, 145.2, 135.4, 131.1, 124.8, 122.7, 109.8, 109.3, 83.2, 51.8, 44.7, 38.8, 32.5, 25.7, 22.6; HRMS(ESI) m/z:  $[M+Na]^+$  calcd for  $C_{16}H_{20}O_3Na$  283.1305; found 283.1299.

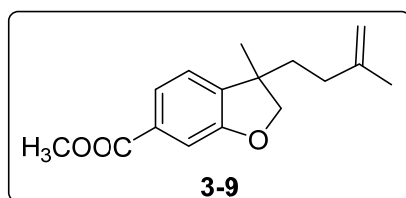

**methyl 3-methyl-3-(3-methylbut-3-en-1-yl)-2,3-dihydrobenzofuran-6-carboxylate: Colorless oil;**  $^1H$  NMR(400MHz,  $CDCl_3$ )  $\delta$ : 7.55-7.53(m, 1H), 7.34(d,  $J=1.2$ Hz, 1H), 7.04(d,  $J=8.0$ Hz, 1H), 4.58(d,  $J=16.0$ Hz, 2H), 4.35(d,  $J=8.4$ Hz, 1H), 4.14(d,  $J=8.8$ Hz, 1H), 3.81(s, 3H), 1.97-1.93(m, 1H), 1.71-1.65(m, 3H), 1.60(s, 3H), 1.29(s, 3H);  $^{13}C$  NMR(100MHz,  $CDCl_3$ )  $\delta$ : 166.9, 159.7, 145.3, 140.5, 130.4, 122.6, 122.5, 110.4, 109.8, 82.5, 52.1, 45.2, 38.7, 32.5, 25.5, 22.6; HRMS(ESI) m/z:  $[M+Na]^+$  calcd for  $C_{16}H_{20}O_3Na$  283.1305; found 283.1297.

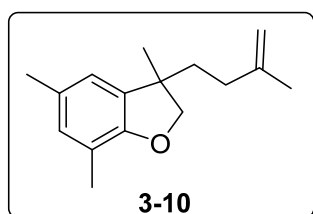

**3,5,7-trimethyl-3-(3-methylbut-3-en-1-yl)-2,3-dihydrobenzofuran: Colorless oil;**  $^1H$  NMR(400MHz,  $CDCl_3$ )  $\delta$ : 6.68(s, 1H), 6.63(s, 1H), 4.58(d,  $J=7.6$ Hz, 2H), 4.27(d,  $J=8.4$ Hz, 1H), 4.06(d,  $J=8.4$ Hz, 1H), 2.19(s, 3H), 2.10(s, 3H), 2.00-1.93(m, 1H), 1.78-1.64(m, 3H), 1.61(s, 3H), 1.25(s, 3H);  $^{13}C$  NMR(100MHz,  $CDCl_3$ )  $\delta$ : 155.6, 145.8, 134.3, 129.8, 129.6, 120.6, 119.1, 109.6, 82.1, 45.3, 38.8, 32.7, 25.6, 22.7, 20.8, 15.0; MS (EI): m/z(%) 230 (95)  $[M]^+$ , 161(100), 133(92), 91(30).

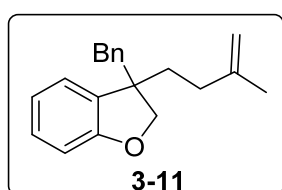

**3-benzyl-3-(3-methylbut-3-en-1-yl)-2,3-dihydrobenzofuran: Yellow oil;**  $^1\text{H}$  NMR(400MHz,  $\text{CDCl}_3$ )  $\delta$ : 7.16-7.12(m, 3H), 7.07-7.03(m, 1H), 6.89-6.84(m, 3H), 6.81-6.77(m, 1H), 6.65(d,  $J=8.0\text{Hz}$ , 1H), 4.58(d,  $J=13.6\text{Hz}$ , 2H), 4.38(d,  $J=8.8\text{Hz}$ , 1H), 4.15(d,  $J=8.8\text{Hz}$ , 1H), 2.94-2.85(m, 2H), 2.01-1.95(m, 1H), 1.78-1.71(m, 3H), 1.60(s, 3H);  $^{13}\text{C}$  NMR(100MHz,  $\text{CDCl}_3$ )  $\delta$ : 160.0, 145.6, 137.2, 132.6, 130.3, 128.3, 127.9, 126.5, 123.9, 120.1, 109.8, 109.6, 79.6, 49.7, 45.1, 35.9, 32.5, 22.7; HRMS(ESI)  $m/z$ :  $[\text{M}+\text{H}]^+$  calcd for  $\text{C}_{20}\text{H}_{23}\text{O}$  279.1743; found 279.1739.

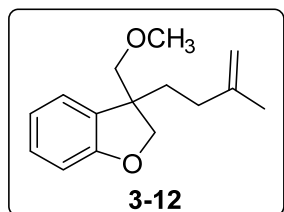

**3-(methoxymethyl)-3-(3-methylbut-3-en-1-yl)-2,3-dihydrobenzofuran: Colorless oil;**  $^1\text{H}$  NMR(400MHz,  $\text{CDCl}_3$ )  $\delta$ : 7.10-7.04(m, 2H), 6.82-6.78(m, 1H), 6.72(d,  $J=8.0\text{Hz}$ , 1H), 4.59(d,  $J=10.0\text{Hz}$ , 2H), 4.37(d,  $J=9.2\text{Hz}$ , 1H), 4.26(d,  $J=9.2\text{Hz}$ , 1H), 3.44-3.38(m, 2H), 3.27(s, 3H), 1.98-1.66(m, 4H), 1.62(s, 3H);  $^{13}\text{C}$  NMR(100MHz,  $\text{CDCl}_3$ )  $\delta$ : 160.2, 145.7, 130.9, 128.6, 123.7, 120.3, 109.7, 109.6, 78.6, 78.3, 59.4, 50.0, 33.9, 32.3, 22.7; HRMS(APCI)  $m/z$ :  $[\text{M}+\text{H}]^+$  calcd for  $\text{C}_{15}\text{H}_{21}\text{O}_2$  233.1536; found 233.1531.

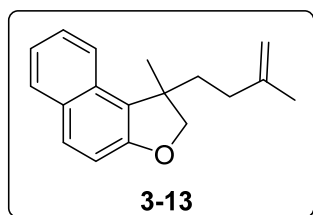

**1-methyl-1-(3-methylbut-3-en-1-yl)-1,2-dihydronaphtho[2,1-b]furan: Yellow oil;**  $^1\text{H}$  NMR(400MHz,  $\text{CDCl}_3$ )  $\delta$ : 7.79(d,  $J=8.4\text{Hz}$ , 1H), 7.71(d,  $J=8.4\text{Hz}$ , 1H), 7.57(d,  $J=8.8\text{Hz}$ , 1H), 7.35-7.32(m, 1H), 7.18(t,  $J=7.6\text{Hz}$ , 1H), 6.99(d,  $J=8.4\text{Hz}$ , 1H), 4.54(d,  $J=12.4\text{Hz}$ , 2H), 4.43(d,  $J=8.8\text{Hz}$ , 1H), 4.20(d,  $J=8.8\text{Hz}$ , 1H), 2.18-2.11(m, 1H), 2.03-1.95(m, 1H), 1.88-1.80(m, 1H), 1.66-1.61(m, 1H), 1.56(s, 3H), 1.55(s, 3H);  $^{13}\text{C}$  NMR(100MHz,  $\text{CDCl}_3$ )  $\delta$ : 157.6, 145.7, 130.6, 129.9, 129.7, 129.4, 126.5, 123.8, 122.5, 121.6, 112.3, 109.6, 82.5, 47.0, 37.8, 32.9, 26.6, 22.7; HRMS(APCI)  $m/z$ :  $[\text{M}+\text{H}]^+$  calcd for  $\text{C}_{18}\text{H}_{21}\text{O}$  253.1587; found 253.1586.

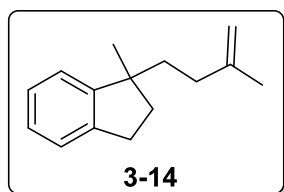

**1-methyl-1-(3-methylbut-3-en-1-yl)-2,3-dihydro-1H-indene: Colorless oil;**  $^1\text{H}$  NMR(400MHz,  $\text{CDCl}_3$ )  $\delta$ : 7.21-7.10(m, 4H), 4.65(s, 2H), 2.88(t,  $J=7.2\text{Hz}$ , 2H), 2.07-1.97(m, 2H), 1.92-1.81(m, 2H), 1.77-1.62(m, 5H), 1.25(s, 3H);  $^{13}\text{C}$  NMR(100MHz,  $\text{CDCl}_3$ )  $\delta$ : 151.3, 146.6, 143.1, 126.2, 126.1, 124.5, 122.6, 109.2, 47.2, 39.3, 38.3, 33.1, 30.2, 26.8, 22.8; MS (EI):  $m/z$ (%) 200 (50)  $[\text{M}]^+$ , 131(100), 115(34), 91(68).

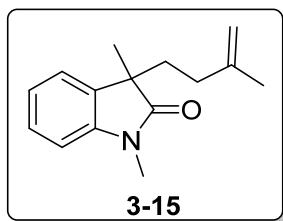

**1,3-dimethyl-3-(3-methylbut-3-en-1-yl)indolin-2-one: Yellow oil;**  $^1\text{H}$  NMR(400MHz,  $\text{CDCl}_3$ )  $\delta$ : 7.23-7.18(m, 1H), 7.11(dd,  $J=0.8\text{Hz}$ , 7.2Hz, 1H), 7.02-6.98(m, 1H), 6.77(d,  $J=7.6\text{Hz}$ , 1H), 4.53-4.44(m, 2H), 3.14(s, 3H), 2.05-1.97(m, 1H), 1.83-1.75(m, 1H), 1.65-1.58(m, 1H), 1.55(s, 3H), 1.49-1.42(m, 1H), 1.30(s, 3H);  $^{13}\text{C}$  NMR(100MHz,  $\text{CDCl}_3$ )  $\delta$ : 180.5, 145.0, 143.3, 133.8, 127.7, 122.5, 122.4, 109.8, 107.9, 48.1, 36.4, 32.5, 26.1, 23.9, 22.4; HRMS(ESI)  $m/z$ :  $[\text{M}+\text{Na}]^+$  calcd for  $\text{C}_{15}\text{H}_{19}\text{NONa}$  252.1359; found 252.1361.

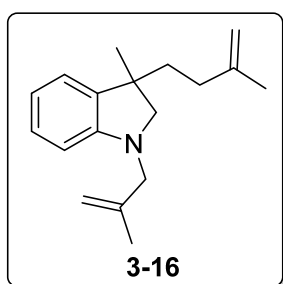

**3-methyl-1-(2-methylallyl)-3-(3-methylbut-3-en-1-yl)indoline: Colorless oil;**  $^1\text{H}$  NMR(400MHz,  $\text{CDCl}_3$ )  $\delta$ : 6.99-6.96(m, 1H), 6.90(d,  $J=7.2\text{Hz}$ , 1H), 6.60-6.57(m, 1H), 6.37(d,  $J=8.0\text{Hz}$ , 1H), 4.87(d,  $J=29.2\text{Hz}$ , 2H), 4.58(s, 2H), 3.56-3.43(m, 2H), 3.14(d,  $J=8.8\text{Hz}$ , 1H), 2.93(d,  $J=8.8\text{Hz}$ , 1H), 2.03-1.95(m, 1H), 1.82-1.75(m, 1H), 1.72-1.62(m, 8H), 1.23(s, 3H);  $^{13}\text{C}$  NMR(100MHz,  $\text{CDCl}_3$ )  $\delta$ : 151.5, 146.2, 142.3, 137.3, 127.4, 122.2, 117.2, 112.0, 109.3, 106.5, 65.4, 55.3, 43.2, 38.7, 32.9, 26.0, 22.7, 20.3; HRMS(ESI)  $m/z$ :  $[\text{M}+\text{H}]^+$  calcd for  $\text{C}_{18}\text{H}_{26}\text{N}$  256.2060; found 256.2054.

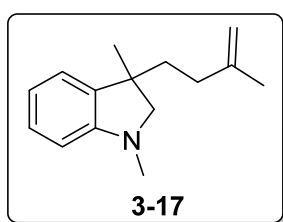

**1,3-dimethyl-3-(3-methylbut-3-en-1-yl)indoline: Colorless oil;**  $^1\text{H}$  NMR(400MHz,  $\text{CDCl}_3$ )  $\delta$ : 7.02(td,  $J=1.2\text{Hz}$ , 7.6Hz, 1H), 6.91(dd,  $J=0.8\text{Hz}$ , 7.2Hz, 1H), 6.64-6.61(m, 1H), 6.41(d,  $J=8.0\text{Hz}$ , 1H), 4.59(s, 2H), 3.13(d,  $J=8.8\text{Hz}$ , 1H), 2.93(d,  $J=8.8\text{Hz}$ , 1H), 2.68(s, 3H), 2.03-1.96(m, 1H), 1.86-1.79(m, 1H), 1.74-1.64(m, 2H), 1.63(s, 3H), 1.23(s, 3H);  $^{13}\text{C}$  NMR(100MHz,  $\text{CDCl}_3$ )  $\delta$ : 152.3, 146.3, 137.9, 127.5, 122.2, 117.6, 109.4, 107.2, 68.1, 43.5, 38.4, 35.9, 32.9, 25.5, 22.8; HRMS(ESI)  $m/z$ :  $[\text{M}+\text{H}]^+$  calcd for  $\text{C}_{15}\text{H}_{22}\text{N}$  216.1747; found 216.1744.

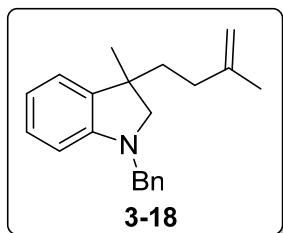

**1-benzyl-3-methyl-3-(3-methylbut-3-en-1-yl)indoline: Colorless oil;**  $^1\text{H}$  NMR(400MHz,  $\text{CDCl}_3$ )  $\delta$ : 7.27-7.21(m, 4H), 7.19-7.15(m, 1H), 6.97(td,  $J=1.2\text{Hz}$ , 7.6Hz, 1H), 6.93-6.91(m, 1H), 6.62-6.59(m, 1H), 6.39(d,  $J=8.0\text{Hz}$ , 1H), 4.56(d,  $J=7.2\text{Hz}$ , 2H), 4.21(d,  $J=15.2\text{Hz}$ , 1H), 4.11(d,  $J=14.8\text{Hz}$ , 1H), 3.11(d,  $J=8.8\text{Hz}$ , 1H), 2.92(d,  $J=8.8\text{Hz}$ , 1H), 1.99-1.92(m, 1H), 1.79-1.62(m, 3H), 1.59(s, 3H), 1.21(s, 3H);  $^{13}\text{C}$  NMR(100MHz,  $\text{CDCl}_3$ )  $\delta$ : 151.4, 146.2, 138.5, 137.4, 128.4, 127.7, 127.5, 127.0, 122.3, 117.5, 109.3, 106.8, 65.4, 52.9, 43.3, 38.7, 32.9, 25.9, 22.7; HRMS(ESI)  $m/z$ :  $[\text{M}+\text{H}]^+$  calcd for  $\text{C}_{21}\text{H}_{26}\text{N}$  292.2060; found 292.2064.

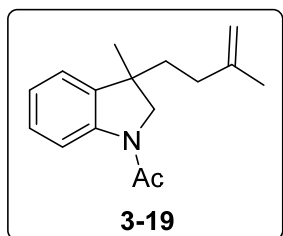

**1-(3-methyl-3-(3-methylbut-3-en-1-yl)indolin-1-yl)ethan-1-one: Yellow oil;**  $^1\text{H}$  NMR(400MHz,  $\text{CDCl}_3$ )  $\delta$ : 8.19(d,  $J=8.0\text{Hz}$ , 1H), 7.33-7.16(m, 1H), 7.13-7.03(m, 2H), 4.66(d,  $J=18.0\text{Hz}$ , 2H), 3.89(d,  $J=10.4\text{Hz}$ , 1H), 3.70(d,  $J=10.0\text{Hz}$ , 1H), 2.23(s, 3H), 2.02-1.93(m, 1H), 1.79-1.74(m, 3H), 1.68(s, 3H), 1.37(s, 3H);  $^{13}\text{C}$  NMR(100MHz,  $\text{CDCl}_3$ )  $\delta$ : 168.5, 145.2, 142.0, 138.7, 127.7, 123.7, 122.2, 116.8, 109.8, 61.1, 43.3, 39.4, 32.5, 27.1, 24.2, 22.6; HRMS(ESI)  $m/z$ :  $[\text{M}+\text{Na}]^+$  calcd for  $\text{C}_{16}\text{H}_{21}\text{NONa}$  266.1515; found 266.1517.

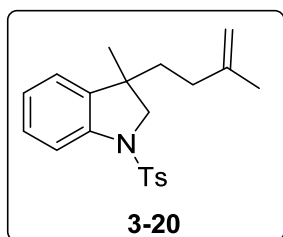

**3-methyl-3-(3-methylbut-3-en-1-yl)-1-tosylindoline: Yellow oil;**  $^1\text{H}$  NMR(400MHz,  $\text{CDCl}_3$ )  $\delta$ : 7.64-7.57(m, 3H), 7.15-7.09(m, 3H), 6.91(d,  $J=4.0\text{Hz}$ , 2H), 4.47(d,  $J=43.2\text{Hz}$ , 2H), 3.68(d,  $J=10.4\text{Hz}$ , 1H), 3.46(d,  $J=10.4\text{Hz}$ , 1H), 2.25(s, 3H), 1.69-1.62(m, 1H), 1.54-1.39(m, 6H), 1.06(s, 3H);  $^{13}\text{C}$  NMR(100MHz,  $\text{CDCl}_3$ )  $\delta$ : 145.1, 144.0, 141.0, 139.0, 133.8, 129.6, 127.9, 127.1, 123.5, 122.9, 114.2, 109.6, 61.0, 43.2, 38.8, 32.3, 26.5, 22.5, 21.4; HRMS(ESI)  $m/z$ :  $[\text{M}+\text{Na}]^+$  calcd for  $\text{C}_{21}\text{H}_{25}\text{NO}_2\text{SNa}$  378.1498; found 378.1501.



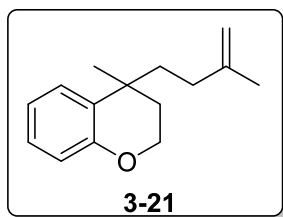

**4-methyl-4-(3-methylbut-3-en-1-yl)chromane: Colorless oil;**  $^1\text{H}$  NMR(400MHz,  $\text{CDCl}_3$ )  $\delta$ : 7.20(dd,  $J=1.6\text{Hz}$ , 8.0Hz, 1H), 7.09-7.05(m, 1H), 6.90-6.86(m, 1H), 6.79(dd,  $J=1.2\text{Hz}$ , 8.4Hz, 1H), 4.66(d,  $J=7.6\text{Hz}$ , 2H), 4.25-4.20(m, 1H), 4.17-4.12(m, 1H), 2.04-1.97(m, 2H), 1.87-1.75(m, 3H), 1.71-1.66(m, 4H), 1.33(s, 3H);  $^{13}\text{C}$  NMR(100MHz,  $\text{CDCl}_3$ )  $\delta$ : 154.1, 146.1, 130.6, 127.1, 127.0, 120.4, 117.0, 109.5, 62.9, 40.5, 34.0, 33.4, 32.3, 29.5, 22.7; MS (EI):  $m/z(\%)$  216 (28)  $[\text{M}]^+$ , 147(100), 91(80).

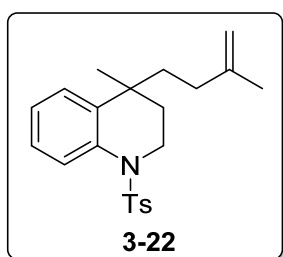

**4-methyl-4-(3-methylbut-3-en-1-yl)-1-tosyl-1,2,3,4-tetrahydroquinoline; white solid;**  $^1\text{H}$  NMR(400MHz,  $\text{CDCl}_3$ )  $\delta$ : 7.92-7.89(m, 1H), 7.47(d,  $J=8.0\text{Hz}$ , 2H), 7.19-7.13(m, 5H), 4.51(d,  $J=58.4\text{Hz}$ , 2H), 4.20-4.14(m, 1H), 3.61-3.54(m, 1H), 2.32(s, 3H), 1.56-1.39(m, 6H), 1.27-1.16(m, 3H), 1.09(s, 3H);  $^{13}\text{C}$  NMR(100MHz,  $\text{CDCl}_3$ )  $\delta$ : 145.6, 143.6, 137.4, 137.0, 136.1, 129.5, 127.2, 127.1, 126.2, 125.3, 125.0, 109.4, 43.7, 40.4, 35.5, 31.9, 30.9, 22.4, 21.4; HRMS(ESI)  $m/z$ :  $[\text{M}+\text{Na}]^+$  calcd for  $\text{C}_{22}\text{H}_{27}\text{NO}_2\text{SNa}$  392.1655; found 392.1653.

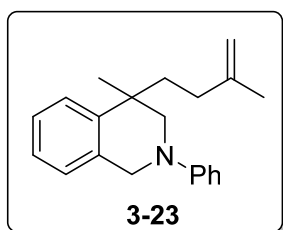

**4-methyl-4-(3-methylbut-3-en-1-yl)-2-phenyl-1,2,3,4-tetrahydroisoquinoline: Yellow oil;**  $^1\text{H}$  NMR(400MHz,  $\text{CDCl}_3$ )  $\delta$ : 7.27-7.22(m, 3H), 7.16-7.08(m, 3H), 6.91(d,  $J=8.0\text{Hz}$ , 2H), 6.78-6.74(m, 1H), 4.57(d,  $J=5.2\text{Hz}$ , 2H), 4.36(d,  $J=15.2\text{Hz}$ , 1H), 4.24(d,  $J=15.2\text{Hz}$ , 1H), 3.42(d,  $J=12.4\text{Hz}$ , 1H), 3.09(d,  $J=12.0\text{Hz}$ , 1H), 1.94-1.71(m, 4H), 1.59(s, 3H), 1.30(s, 3H);  $^{13}\text{C}$  NMR(100MHz,  $\text{CDCl}_3$ )  $\delta$ : 150.8, 146.2, 142.7, 133.6, 129.2, 126.5, 126.4, 126.0, 125.8, 118.4, 114.6, 109.5, 57.5, 51.0, 38.9, 38.3, 32.8, 25.7, 22.7; MS (EI):  $m/z(\%)$  291(24)  $[\text{M}]^+$ , 145(50), 129(100).

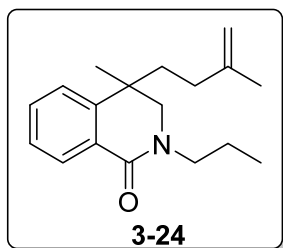

**4-methyl-4-(3-methylbut-3-en-1-yl)-2-propyl-3,4-dihydroisoquinolin-1(2H)-one: Yellow oil;**

$^1\text{H}$  NMR(400MHz,  $\text{CDCl}_3$ )  $\delta$ : 8.13-8.10(m, 1H), 7.48(td,  $J=1.6\text{Hz}$ , 7.6Hz, 1H), 7.35-7.31(m, 1H), 7.25-7.23(m, 1H), 4.64(d,  $J=20.0\text{Hz}$ , 2H), 3.61-3.47(m, 2H), 3.44(d,  $J=12.8\text{Hz}$ , 1H), 3.27(d,  $J=12.4\text{Hz}$ , 1H), 2.01-1.96(m, 1H), 1.83-1.66(m, 8H), 1.34(s, 3H), 0.99-0.96(t,  $J=7.2\text{Hz}$ , 3H);  $^{13}\text{C}$  NMR(100MHz,  $\text{CDCl}_3$ )  $\delta$ : 164.0, 145.3, 145.2, 131.5, 128.6, 128.5, 126.7, 124.1, 109.9, 56.4, 49.1, 37.2, 36.8, 32.4, 23.1, 22.6, 20.7, 11.4; HRMS(ESI)  $m/z$ :  $[\text{M}+\text{Na}]^+$  calcd for  $\text{C}_{18}\text{H}_{25}\text{NO}$  294.1828; found 294.1834.

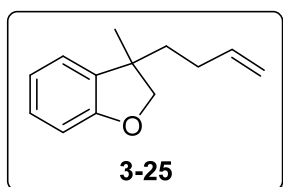

**3-(but-3-en-1-yl)-3-methyl-2,3-dihydrobenzofuran: Colorless oil;**  $^1\text{H}$  NMR(400MHz,  $\text{CDCl}_3$ )  $\delta$ :

7.07-6.99(m, 2H), 6.82-6.78(m, 1H), 6.70(d,  $J=8.0\text{Hz}$ , 1H), 5.72-5.65(m, 1H), 4.93-4.83(m, 2H), 4.29(d,  $J=8.8\text{Hz}$ , 1H), 4.08(d,  $J=8.8\text{Hz}$ , 1H), 2.07-1.98(m, 1H), 1.83-1.74(m, 1H), 1.65-1.60(m, 2H), 1.27(s, 3H);  $^{13}\text{C}$  NMR(100MHz,  $\text{CDCl}_3$ )  $\delta$ : 159.5, 138.3, 134.8, 128.0, 122.8, 120.4, 114.5, 109.6, 82.4, 45.1, 40.0, 29.0, 25.5; MS (EI):  $m/z$ (%) 188 (77)  $[\text{M}]^+$ , 133(100), 105(100), 77(40).

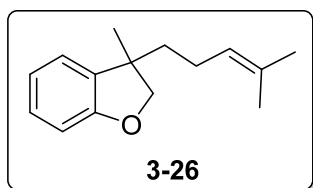

**3-methyl-3-(4-methylpent-3-en-1-yl)-2,3-dihydrobenzofuran: Colorless oil;**  $^1\text{H}$  NMR(400MHz,  $\text{CDCl}_3$ )  $\delta$ : 7.06-6.99(m, 2H), 6.82-6.78(m, 1H), 6.71(d,  $J=8.0\text{Hz}$ , 1H), 4.99-4.95(m, 1H), 4.31(d,  $J=8.4\text{Hz}$ , 1H), 4.09(d,  $J=8.4\text{Hz}$ , 1H), 1.99-1.90(m, 1H), 1.76-1.67(m, 1H), 1.62-1.53(m, 5H), 1.46(s, 3H), 1.27(s, 3H);  $^{13}\text{C}$  NMR(100MHz,  $\text{CDCl}_3$ )  $\delta$ : 159.5, 135.1, 131.8, 127.9, 123.9, 122.8, 120.4, 109.5, 82.4, 45.2, 40.8, 25.7, 25.6, 23.3, 17.6; HRMS(APCI)  $m/z$ :  $[\text{M}+\text{H}]^+$  calcd for  $\text{C}_{15}\text{H}_{21}\text{O}$  217.1587; found 217.1585.

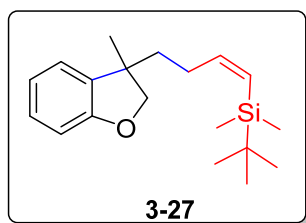

**(Z)-tert-butyl dimethyl(4-(3-methyl-2,3-dihydrobenzofuran-3-yl)but-1-en-1-yl)silane,**

**Colorless oil;**  $^1\text{H}$  NMR(400MHz,  $\text{CDCl}_3$ )  $\delta$ : 7.16-7.09(m, 2H), 6.92-6.88(m, 1H), 6.81(d,  $J=8.0\text{Hz}$ , 1H), 6.04-5.96(m, 1H), 5.66-5.60(m, 1H), 4.40(d,  $J=8.8\text{Hz}$ , 1H), 4.18(d,  $J=8.8\text{Hz}$ , 1H), 2.23-2.17(m, 1H), 2.01-1.94(m, 1H), 1.76-1.71(m, 2H), 1.38(s, 3H), 0.87(s, 9H), 0.01(s, 6H);  $^{13}\text{C}$  NMR(100MHz,  $\text{CDCl}_3$ )  $\delta$ : 159.5, 147.7, 134.9, 128.1, 127.1, 122.8, 120.4, 109.5, 82.4, 45.1, 39.9, 32.1, 26.4, 25.5, 16.4, -6.1; MS (EI):  $m/z$ (%) 302 (10)  $[\text{M}]^+$ , 245(80), 163(100).

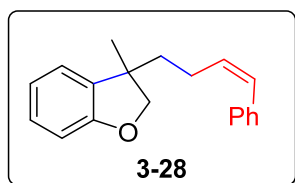

**(Z)-3-methyl-3-(4-phenylbut-3-en-1-yl)-2,3-dihydrobenzofuran, Colorless oil;**  $^1\text{H}$  NMR(400MHz, $\text{CDCl}_3$ )  $\delta$ : 7.22-7.16(m, 4H), 7.09-7.01(m, 3H), 6.82-6.78(m, 1H), 6.72(d,  $J=8.0\text{Hz}$ , 1H), 6.25(d,  $J=15.6\text{Hz}$ , 1H), 6.08-6.01(m, 1H), 4.32(d,  $J=8.4\text{Hz}$ , 1H), 4.09(d,  $J=8.8\text{Hz}$ , 1H), 2.17-2.14(m, 1H), 1.97-1.91(m, 1H), 1.72-1.67(m, 2H), 1.29(s, 3H);  $^{13}\text{C}$  NMR(100MHz,  $\text{CDCl}_3$ )  $\delta$ : 159.5, 137.6, 134.7, 130.1, 129.9, 128.4, 128.1, 126.8, 125.8, 122.8, 120.5, 109.6, 82.3, 45.1, 40.4, 28.3, 25.6; MS (EI):  $m/z$ (%) 264 (40)  $[\text{M}]^+$ , 249(30), 133(100), 105(65).

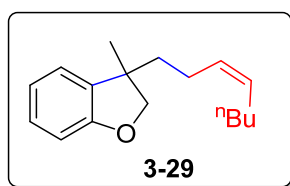

**(Z)-3-methyl-3-(oct-3-en-1-yl)-2,3-dihydrobenzofuran, Colorless oil;**  $^1\text{H}$  NMR (400MHz,  $\text{CDCl}_3$ )  $\delta$ : 7.07-6.99(m, 2H), 6.82-6.78(m, 1H), 6.71(d,  $J=7.6\text{Hz}$ , 1H), 5.33-5.23(m, 2H), 4.29(d,  $J=8.8\text{Hz}$ , 1H), 4.08(d,  $J=8.8\text{Hz}$ , 1H), 1.97-1.92(m, 1H), 1.89-1.84(m, 2H), 1.77-1.69(m, 1H), 1.62-1.57(m, 2H), 1.27(s, 3H), 1.22-1.19(m, 4H), 0.81-0.78(m, 3H);  $^{13}\text{C}$  NMR(100MHz,  $\text{CDCl}_3$ )  $\delta$ : 159.5, 135.1, 130.7, 129.5, 127.9, 122.8, 120.4, 109.5, 82.4, 45.1, 40.7, 32.2, 31.6, 27.8, 25.5, 22.1, 13.9; MS (EI):  $m/z$ (%) 244 (30)  $[\text{M}]^+$ , 133(100), 105(45).

#### 4. References

1. (a) Y. Gao, W. Xiong, H. Chen, W. Wu, J. Peng, Y. Gao and H. Jiang, Pd-Catalyzed Highly Regio- and Stereoselective Formation of C-C Double Bonds: An Efficient Method for the Synthesis of Benzofuran-, Dihydrobenzofuran-, and Indoline-Containing Alkenes, *J. Org. Chem.*, 2015, **80**, 7456; (b) J. He, Y. Xue, B. Han, C. Zhang, Y. Wang and S. Zhu, Nickel-Catalyzed Asymmetric Reductive 1,2-Carboamination of Unactivated Alkenes, *Angew. Chem. Int. Ed.*, 2020, **59**, 2328.
2. (a) W. H. Bunnelle, M. A. Rafferty and S. L. Hodges, Aldol-equivalent elaboration of sterically hindered ketones: methallylmagnesium chloride as a synthon for acetone enolate, *J. Org. Chem.*, 1987, **52**, 1603; (b) M. Iwasaki, S. Hayashi, K. Hirano, H. Yorimitsu and K. Oshima, Pd(OAc)<sub>2</sub>/P(C<sub>6</sub>H<sub>11</sub>)<sub>3</sub>-Catalyzed Allylation of Aryl Halides with Homoallyl Alcohols via Retro-Allylation, *J. Am. Chem. Soc.*, 2007, **129**, 4463.

#### 5. The crystal structure of product 3-22

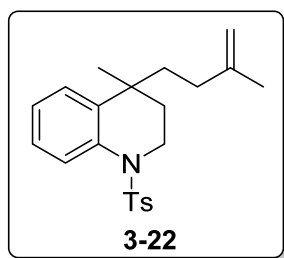

Bond precision: C-C = 0.0027 Å Wavelength=1.54184

Cell: a=14.0561 (3) b=8.6104 (1) c=17.7562 (3)  
 alpha=90 beta=111.764 (2) gamma=90

Temperature: 293 K

|                        | Calculated     | Reported       |
|------------------------|----------------|----------------|
| Volume                 | 1995.83 (7)    | 1995.82 (6)    |
| Space group            | P 21/n         | P 1 21/n 1     |
| Hall group             | -P 2yn         | -P 2yn         |
| Moiety formula         | C22 H27 N O2 S | C22 H27 N O2 S |
| Sum formula            | C22 H27 N O2 S | C22 H27 N O2 S |
| Mr                     | 369.51         | 369.50         |
| Dx, g cm <sup>-3</sup> | 1.230          | 1.230          |
| Z                      | 4              | 4              |
| Mu (mm <sup>-1</sup> ) | 1.553          | 1.553          |
| F000                   | 792.0          | 792.0          |
| F000'                  | 795.35         |                |
| h, k, lmax             | 17, 10, 21     | 17, 10, 21     |
| Nref                   | 3900           | 3822           |
| Tmin, Tmax             | 0.985, 0.985   | 0.756, 1.000   |
| Tmin'                  | 0.985          |                |

Correction method= # Reported T Limits: Tmin=0.756 Tmax=1.000  
 AbsCorr = MULTI-SCAN

Data completeness= 0.980

Theta(max)= 71.544

R(reflections)= 0.0401( 3329)

wR2(reflections)=  
0.1117( 3822)

S = 1.021

Npar= 246

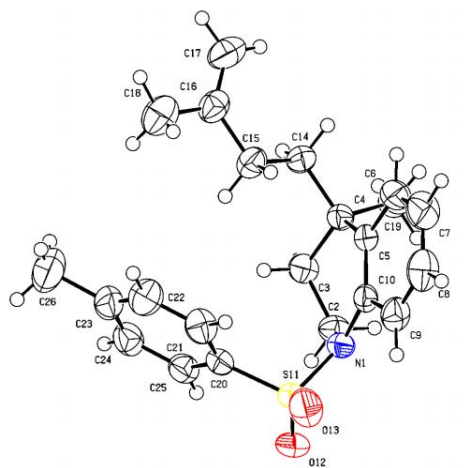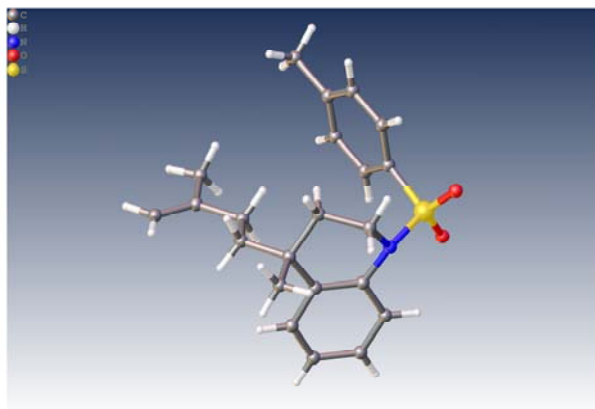

6.  $^1\text{H}$ ,  $^{13}\text{C}$  spectra for compound 3

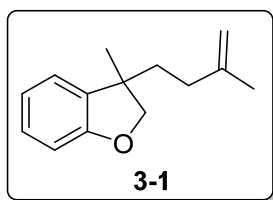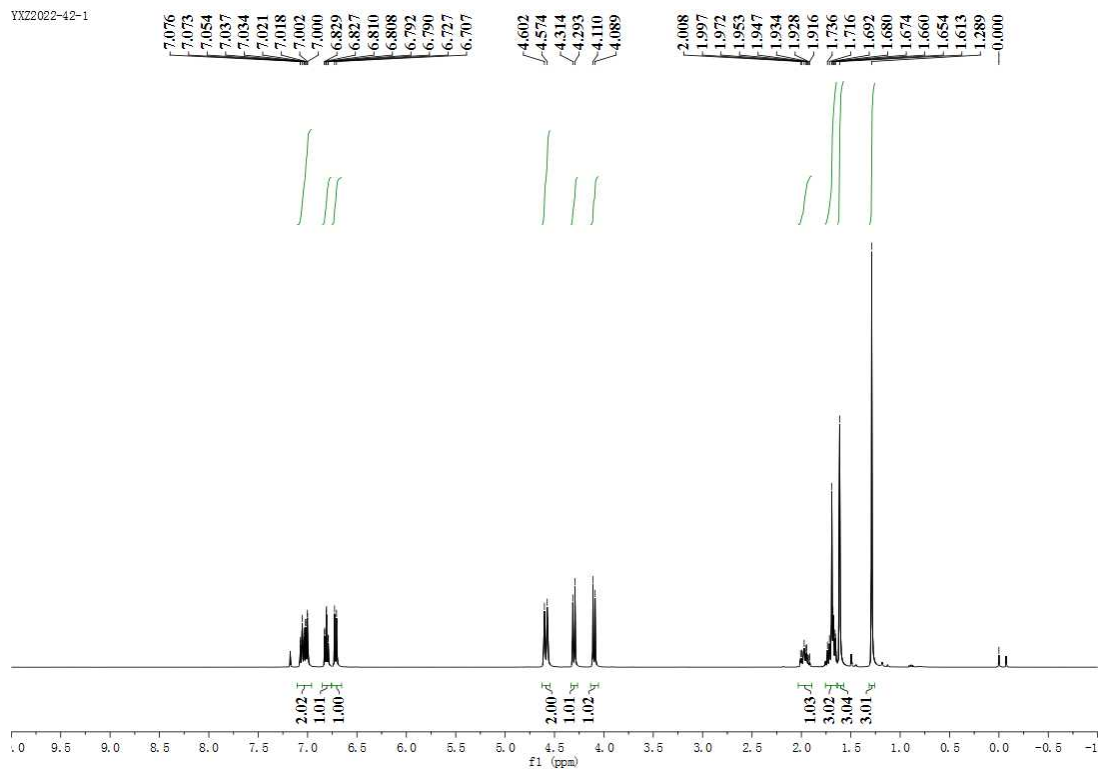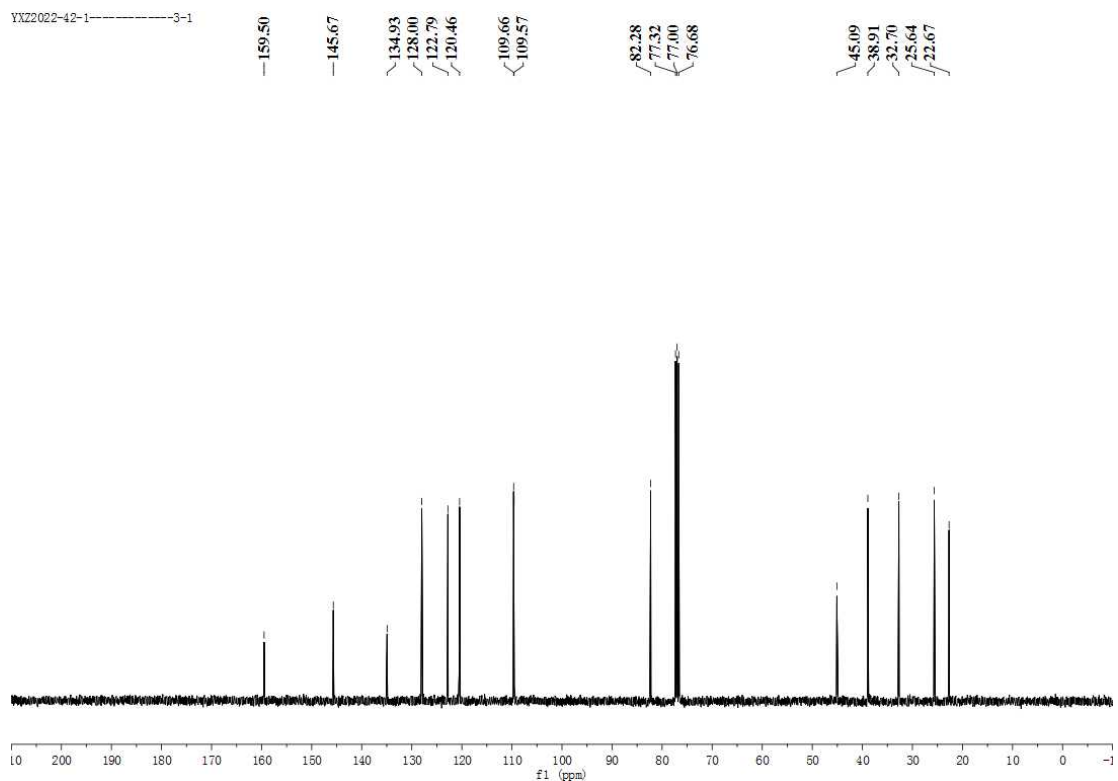

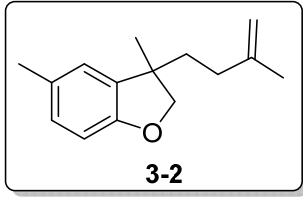

cv2022-36

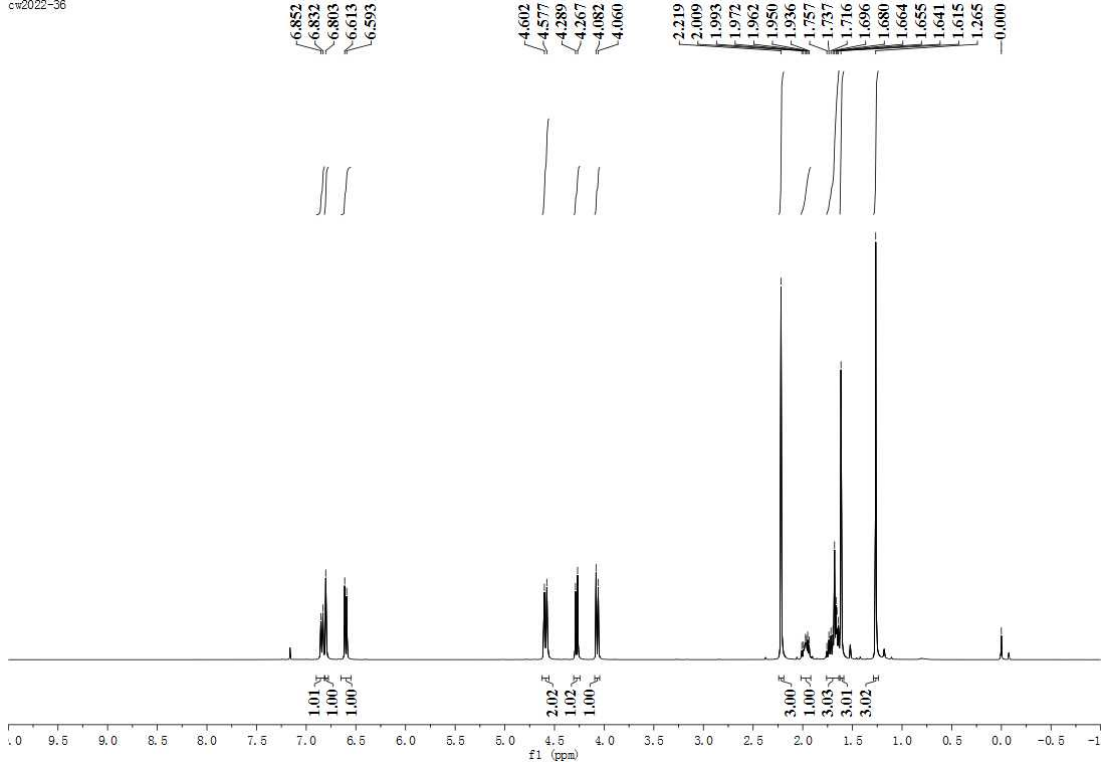

cv2022-36

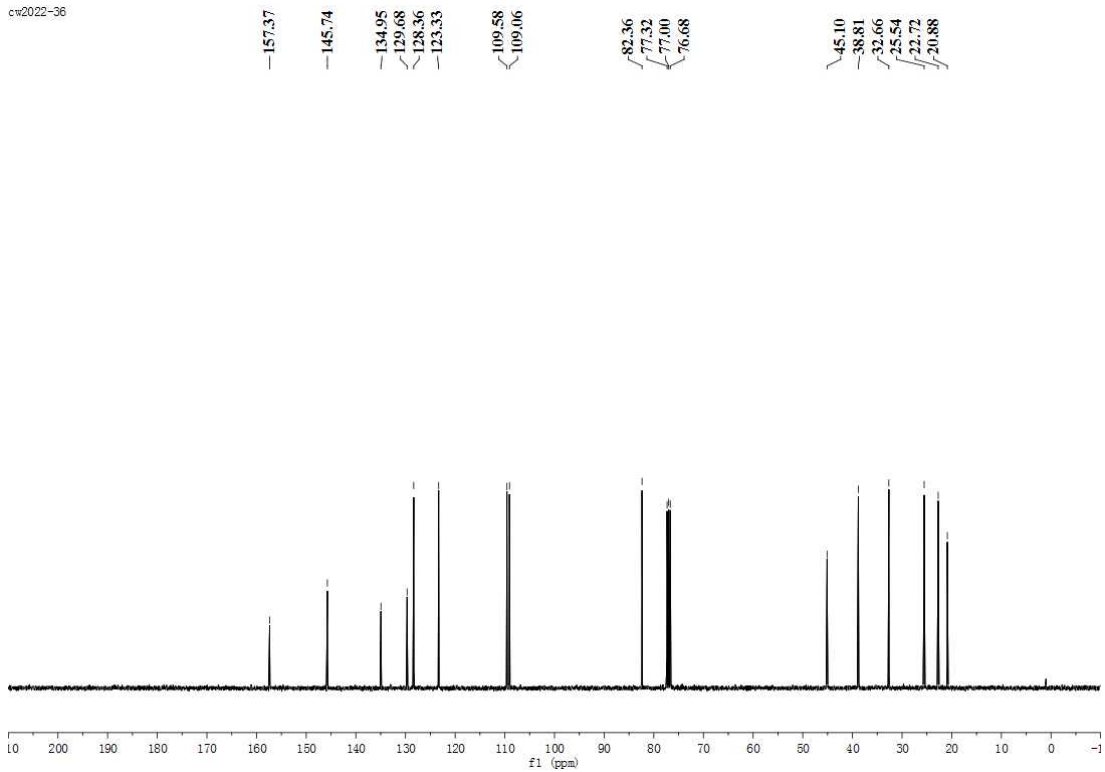

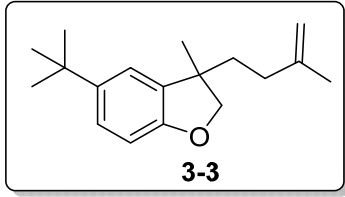

cw2022-8

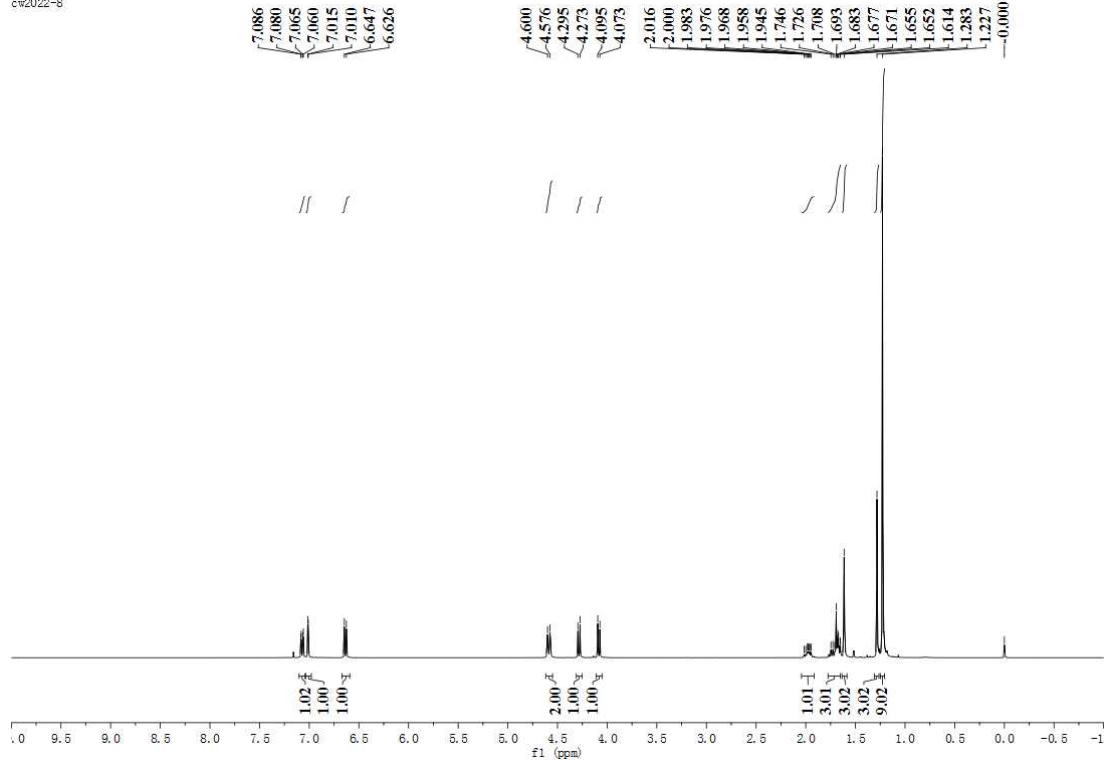

cw2022-8

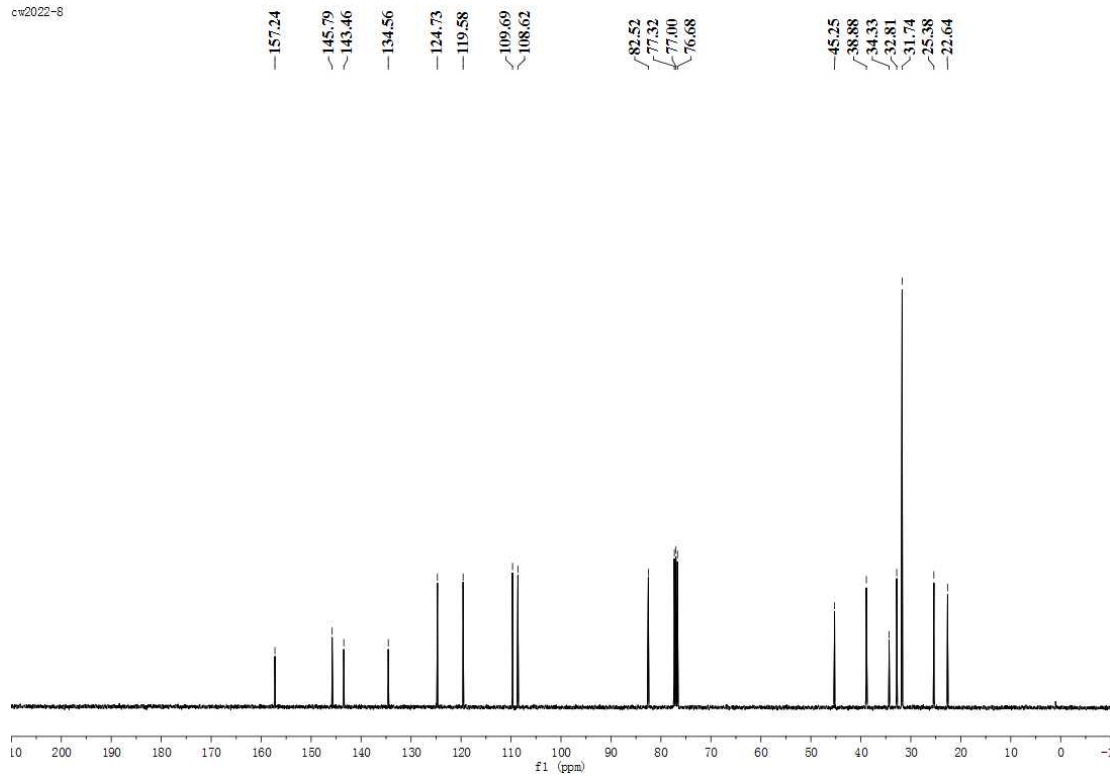



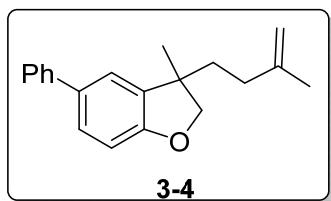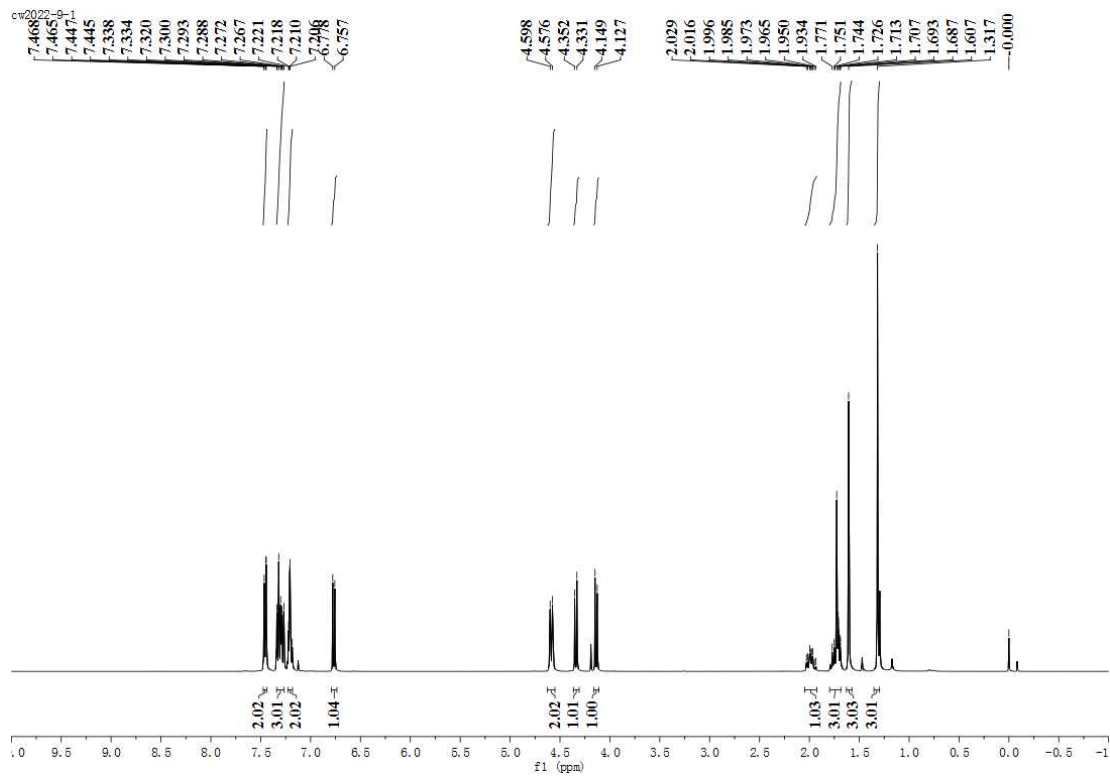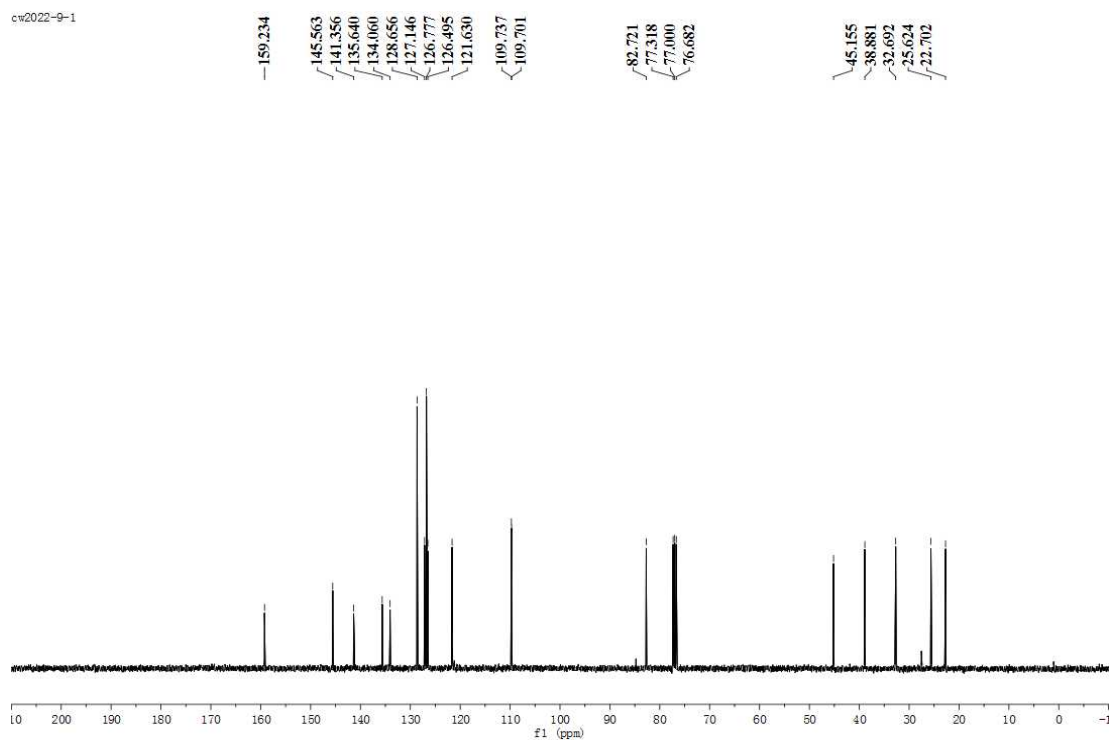

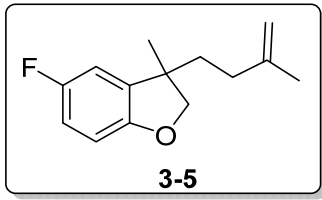

cw2022-10

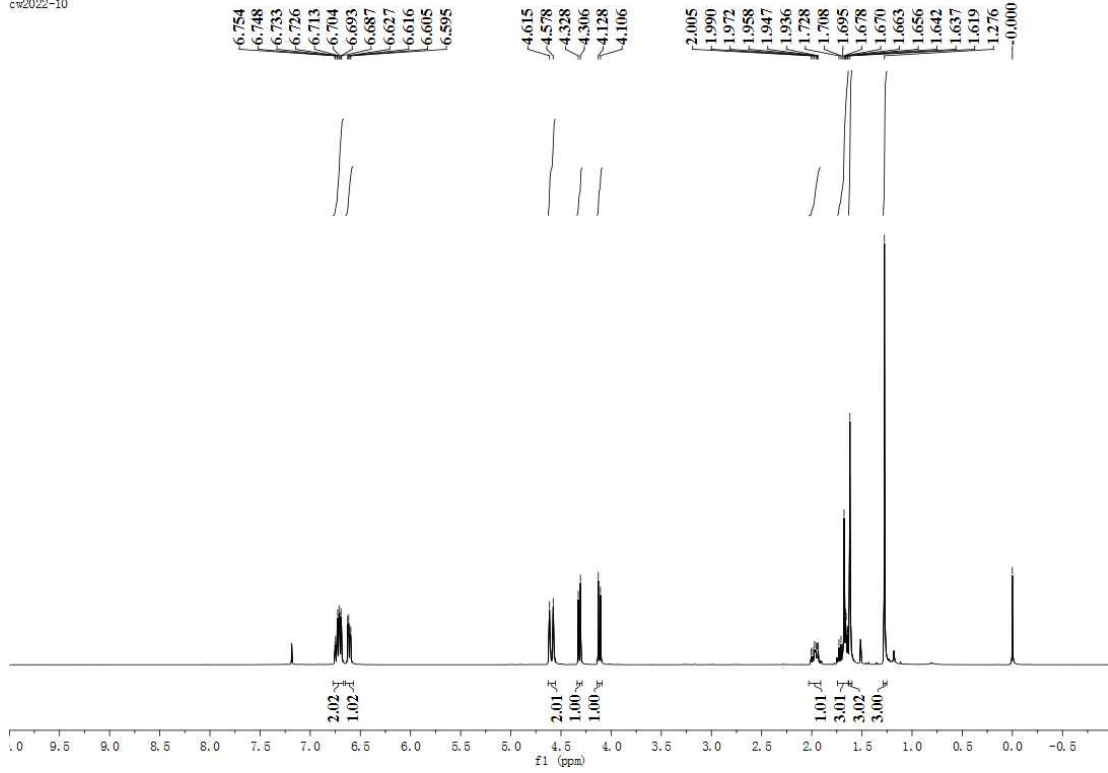

cw2022-10

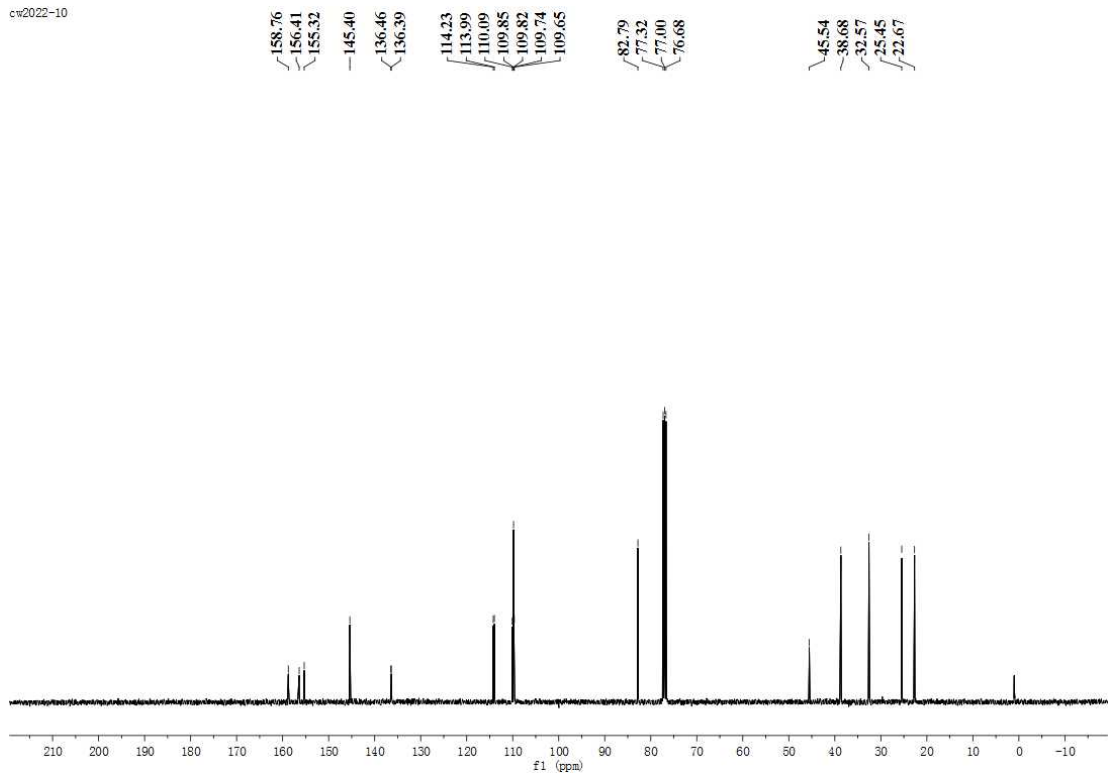

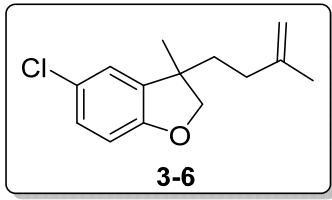

cw2022-11

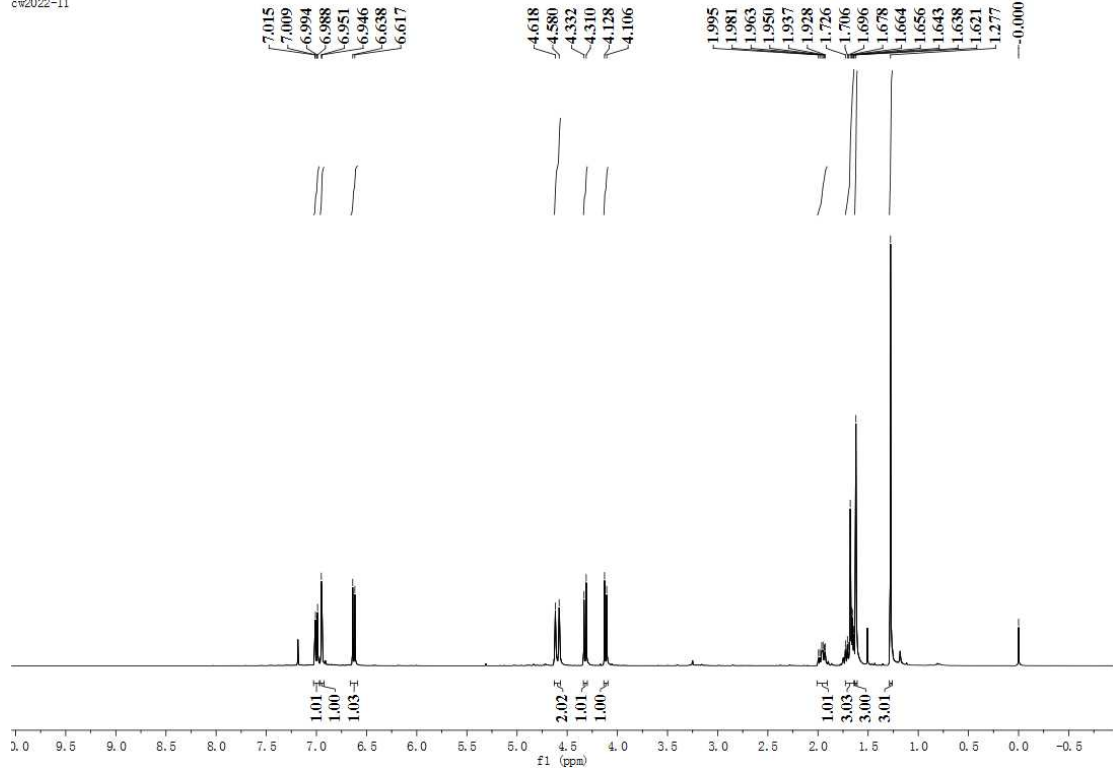

cw2022-11

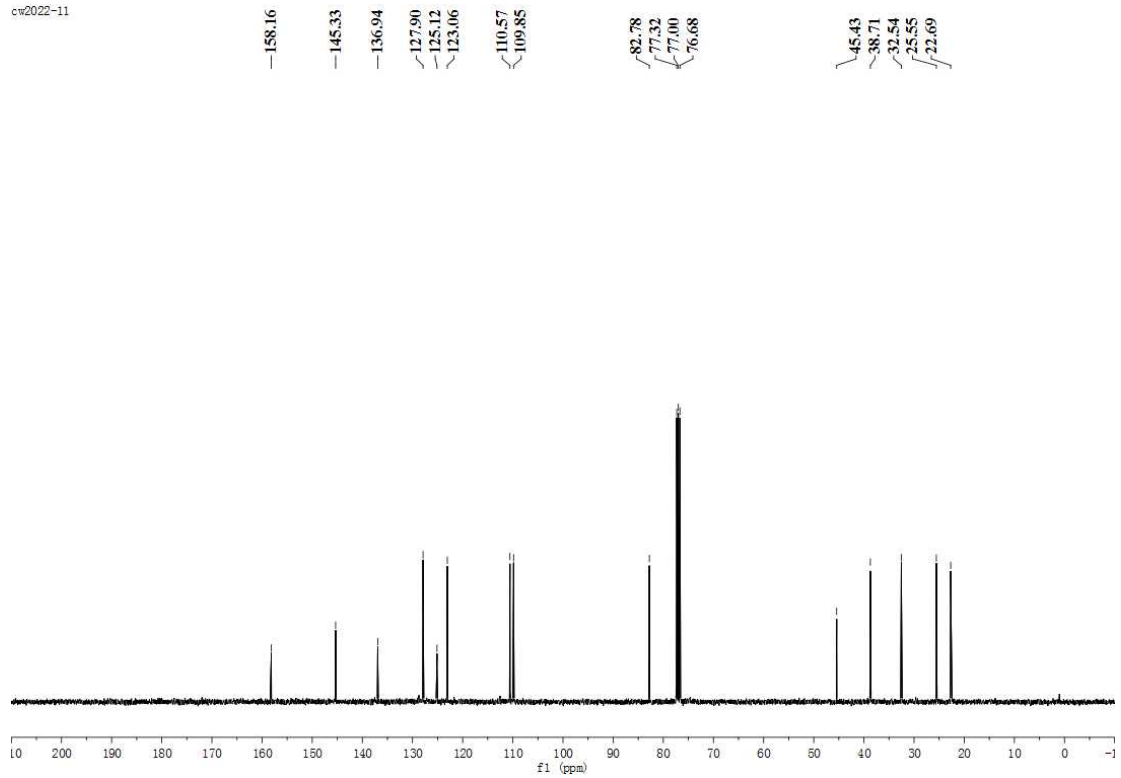

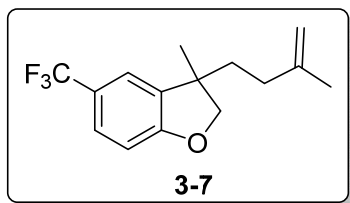

NMR yield: The yield was determined by  $^1\text{H}$  NMR spectroscopy using 1,3,5-trimethoxybenzene as an internal standard.

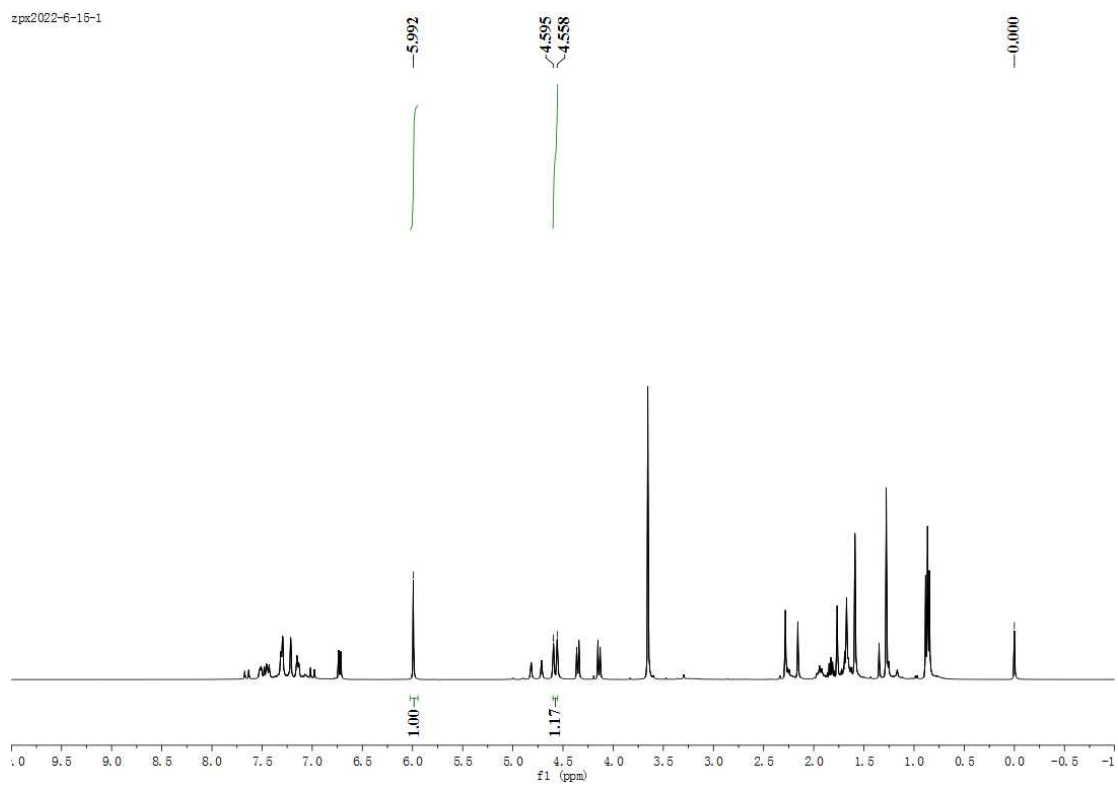

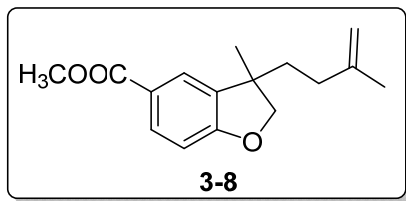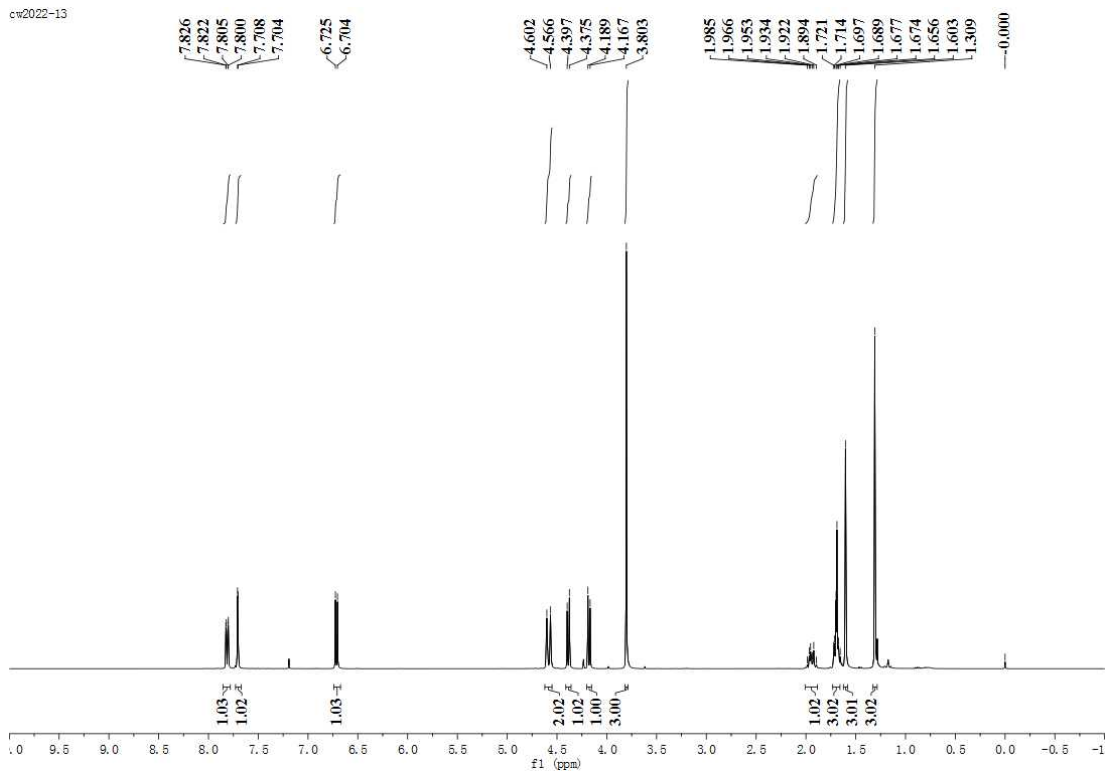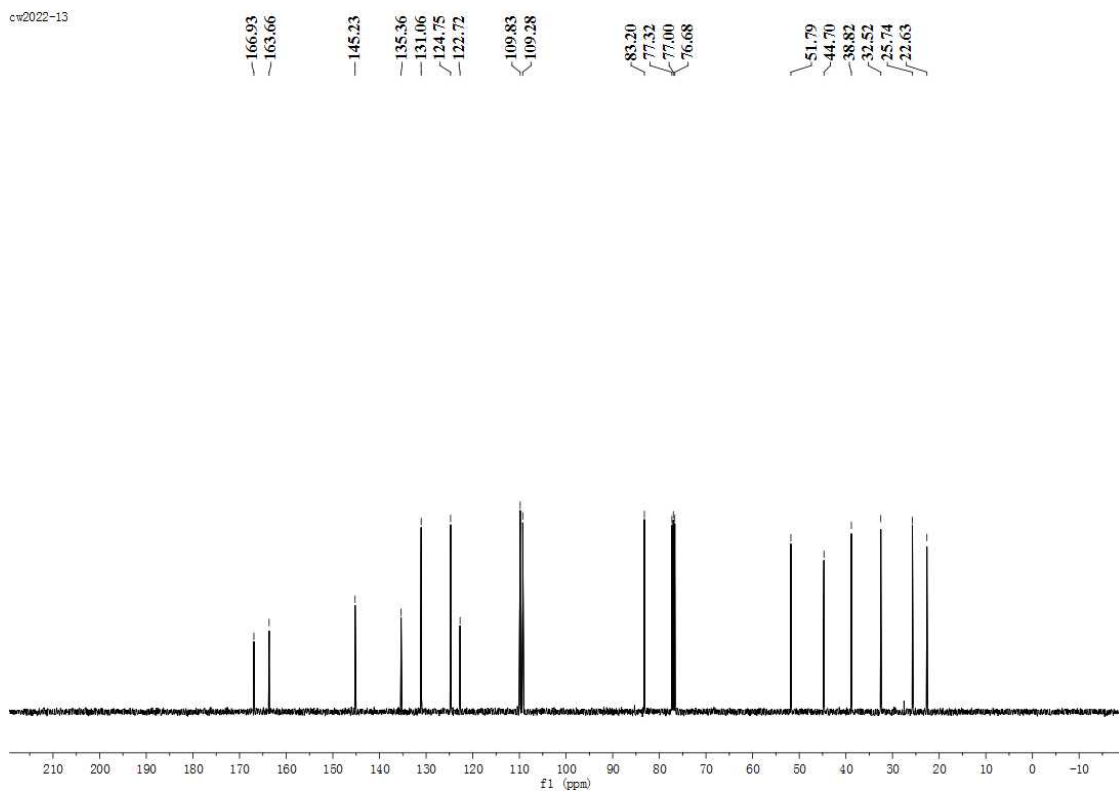

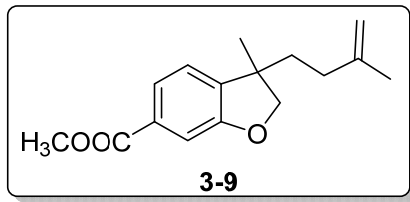

cw2022-16-1

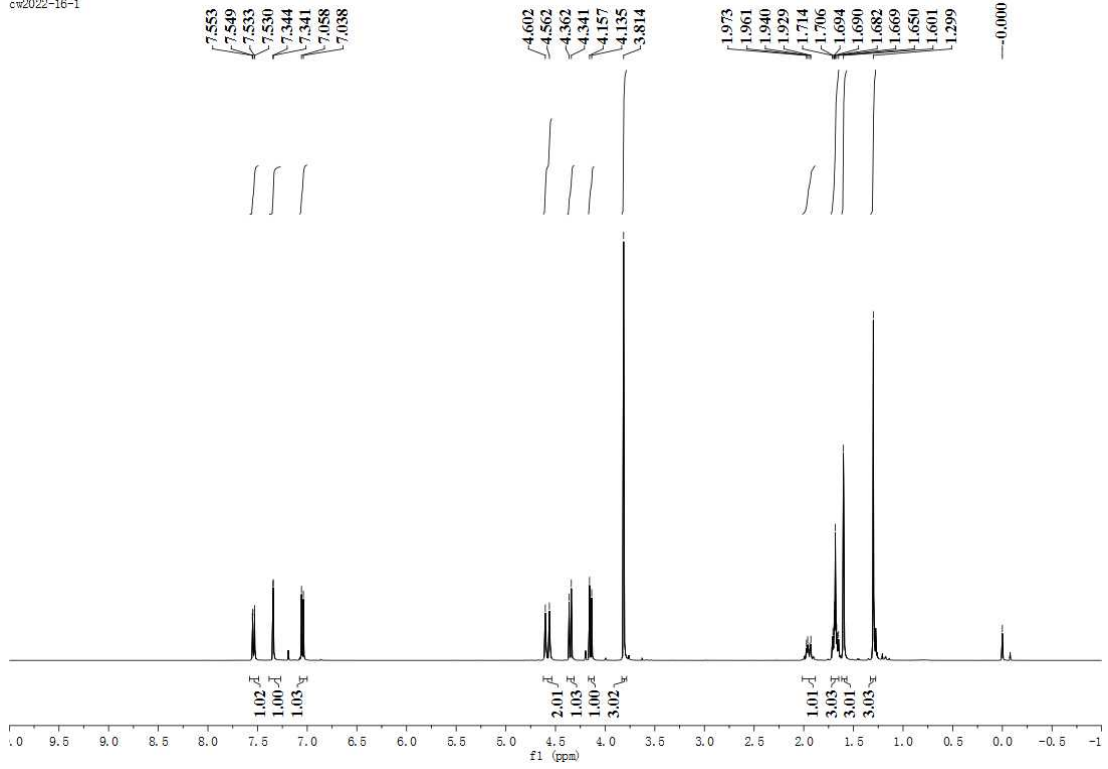

cw2022-16-1

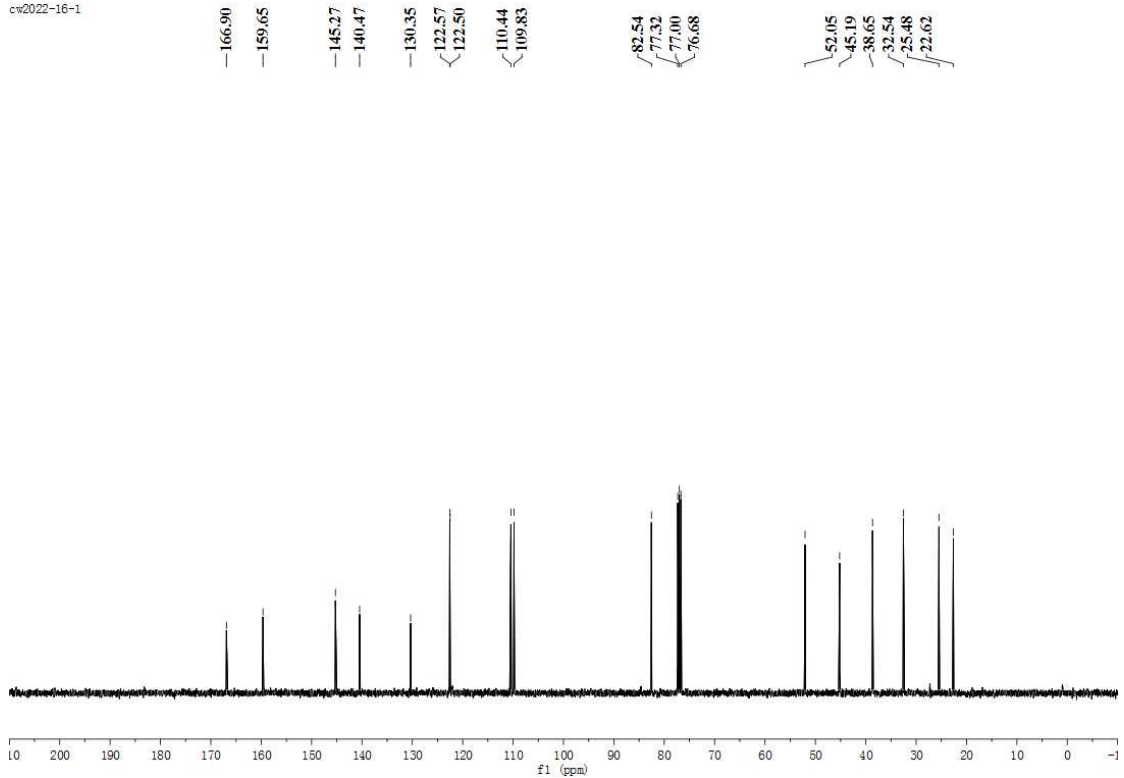

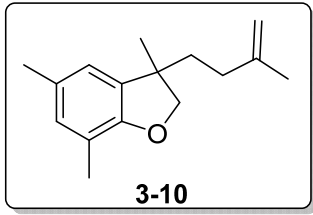

cw2022-15

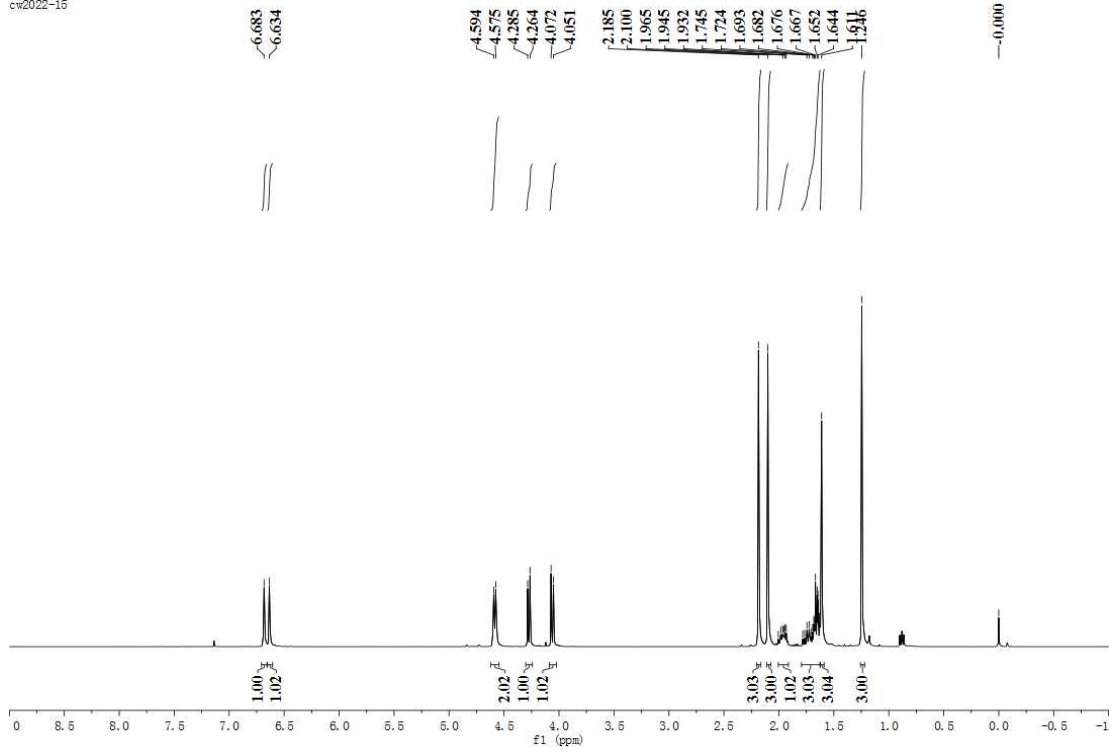

cw2022-15

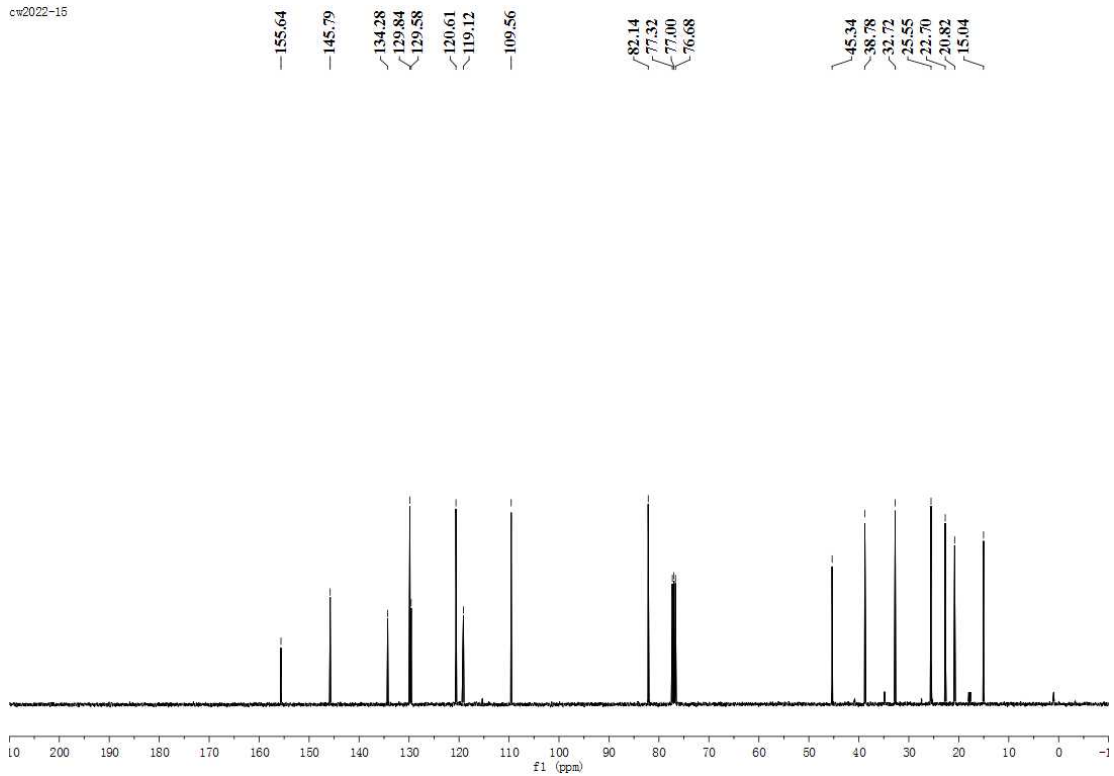

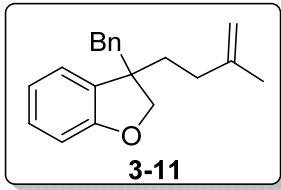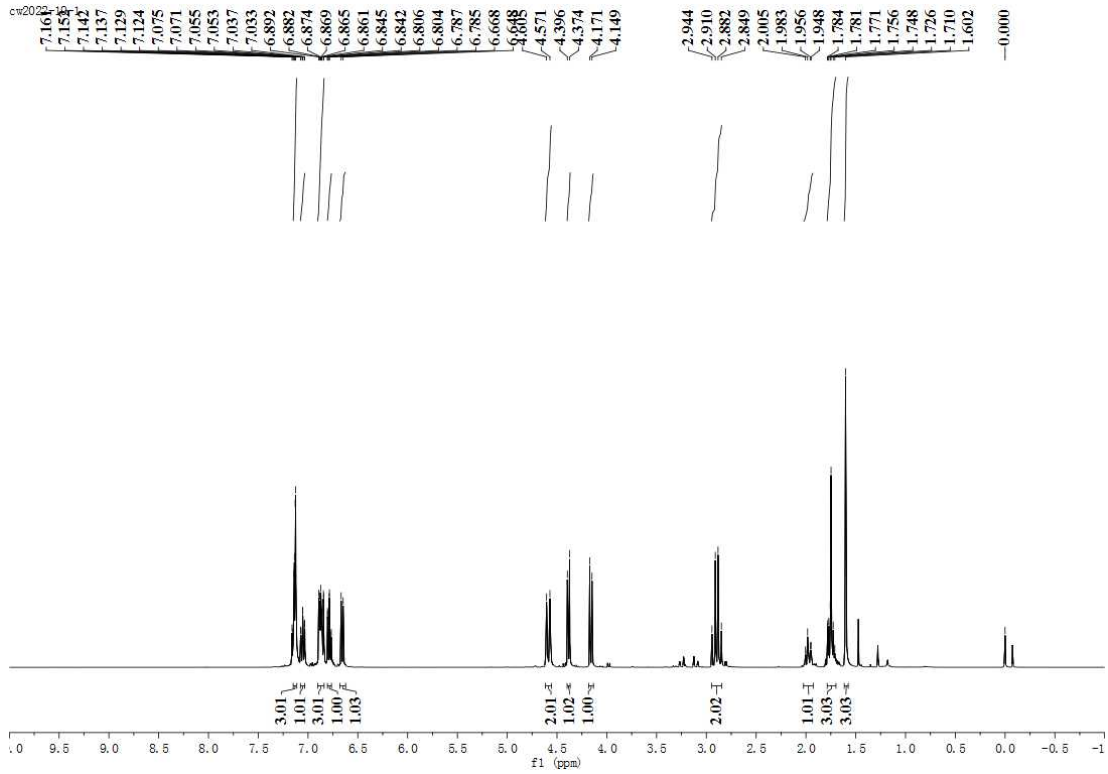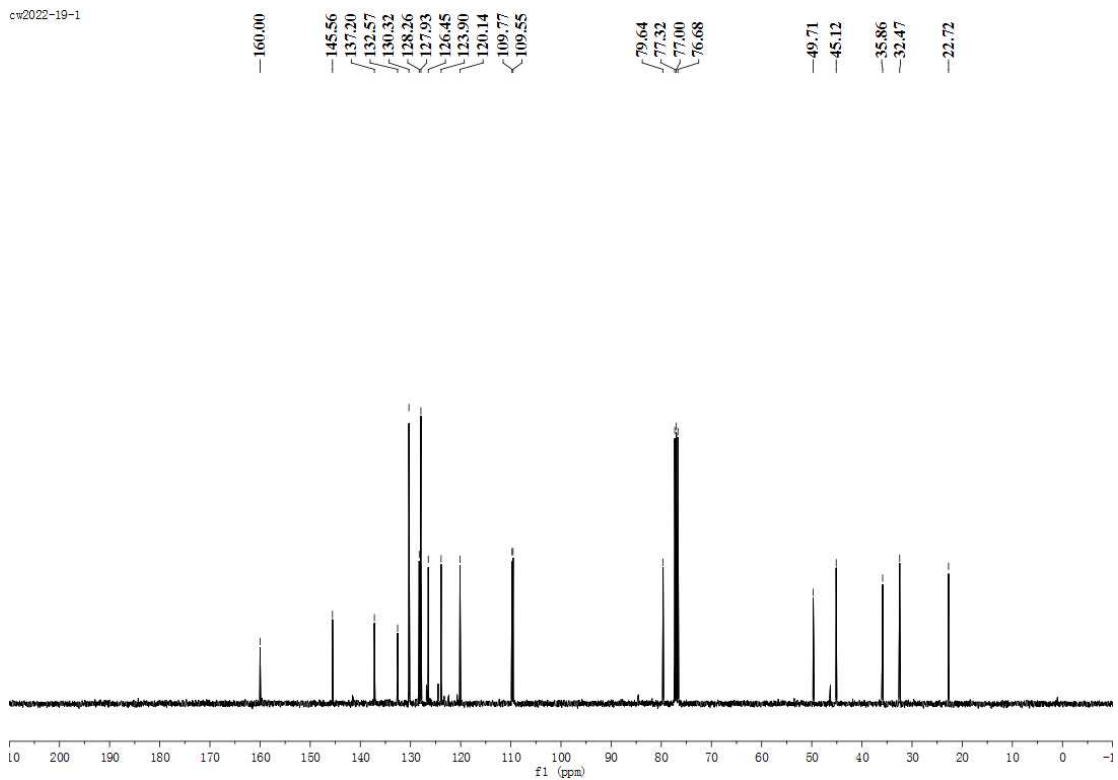



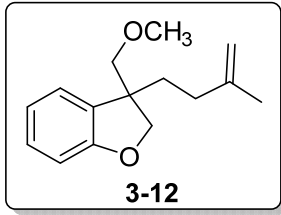

cw2022-18-2

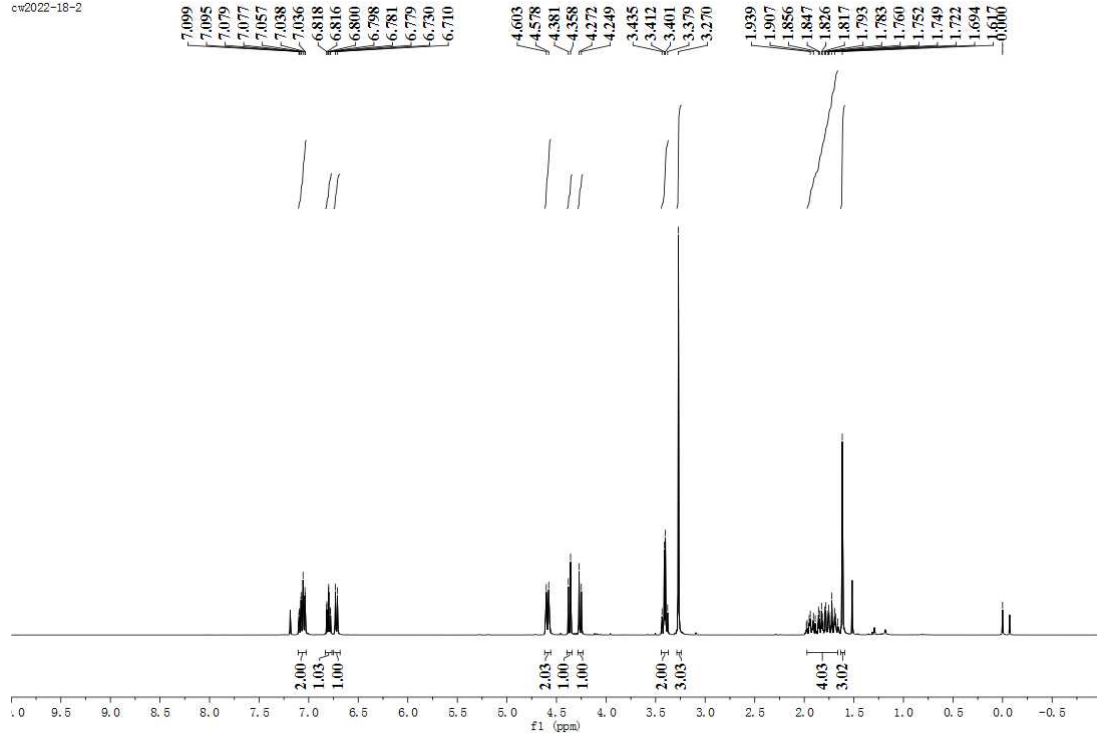

cw2022-18-2

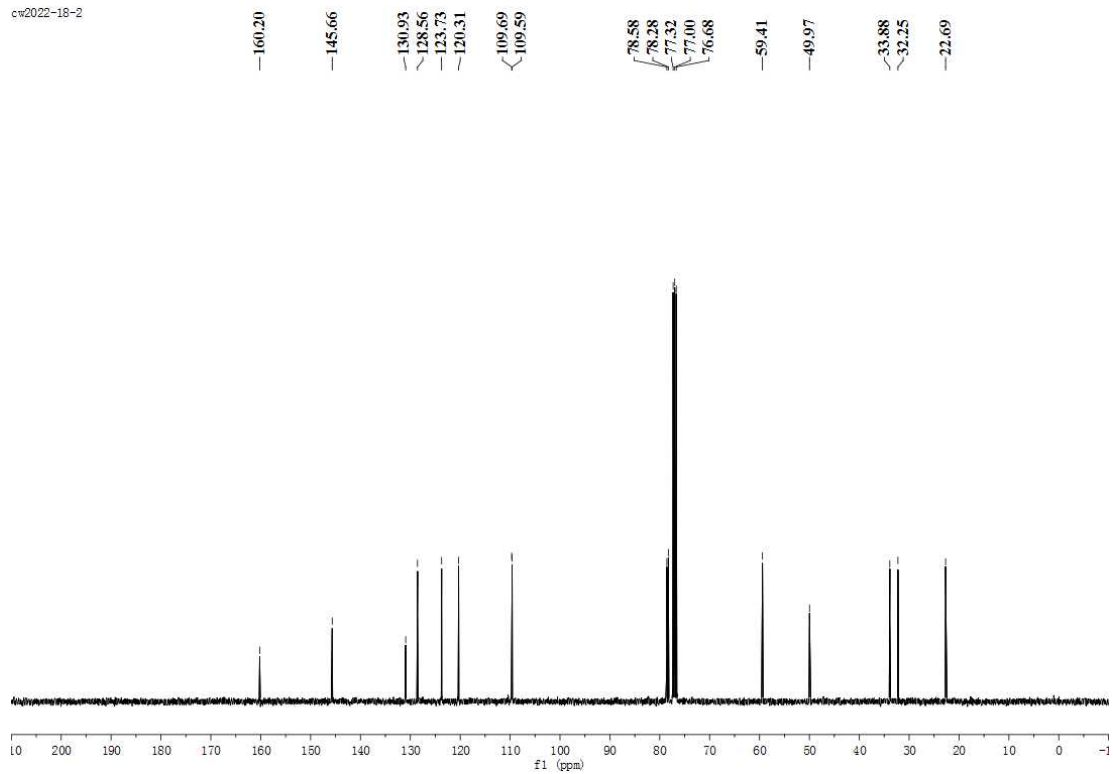

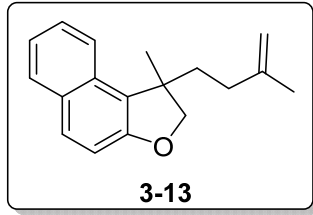

cw2022-17

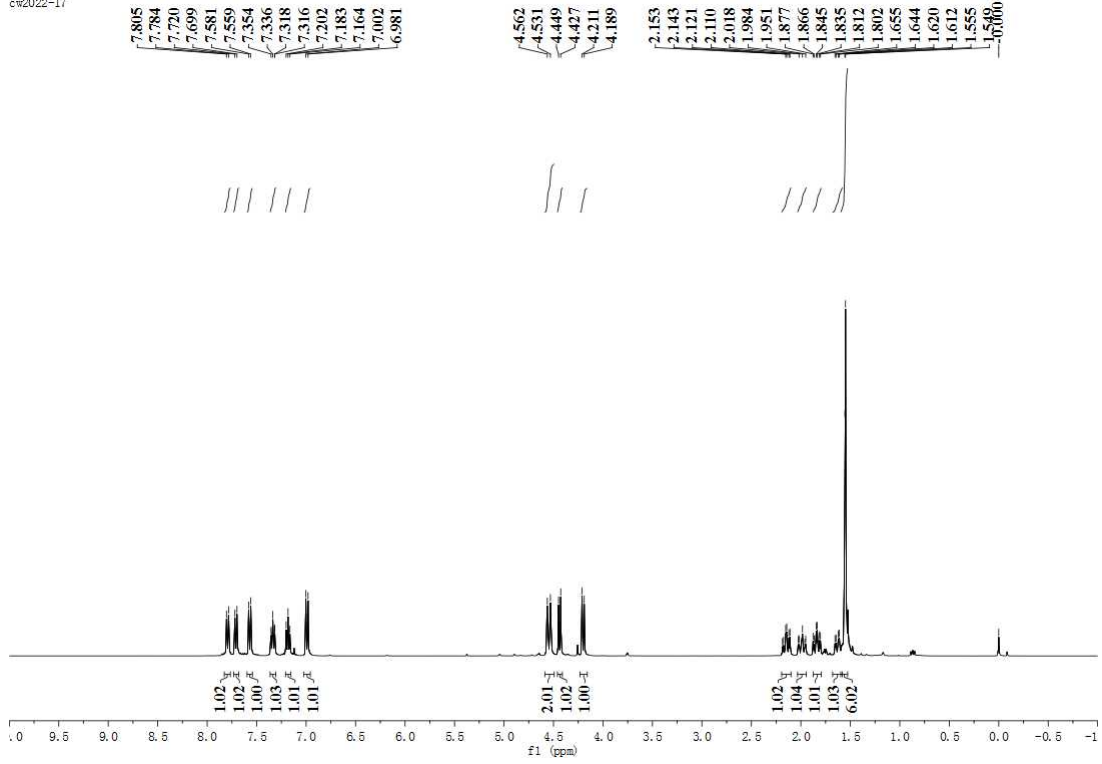

cw2022-17

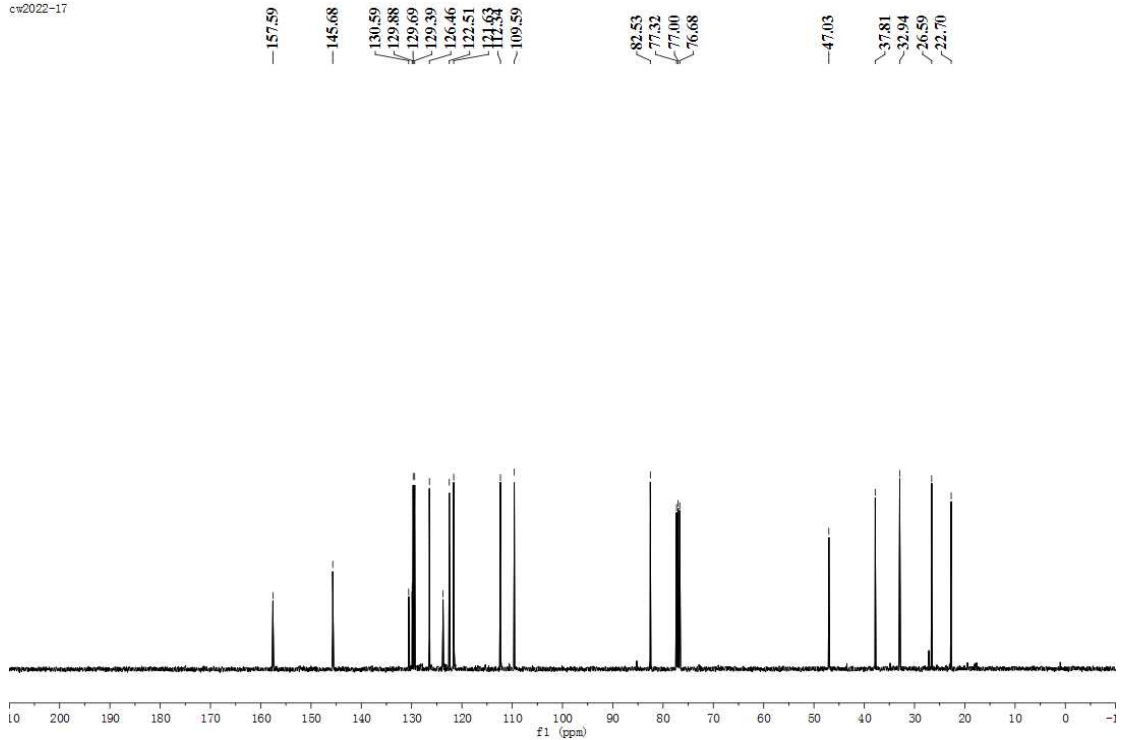

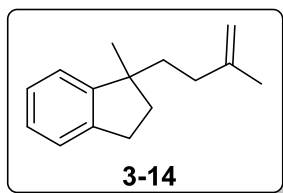

yxz2022-41

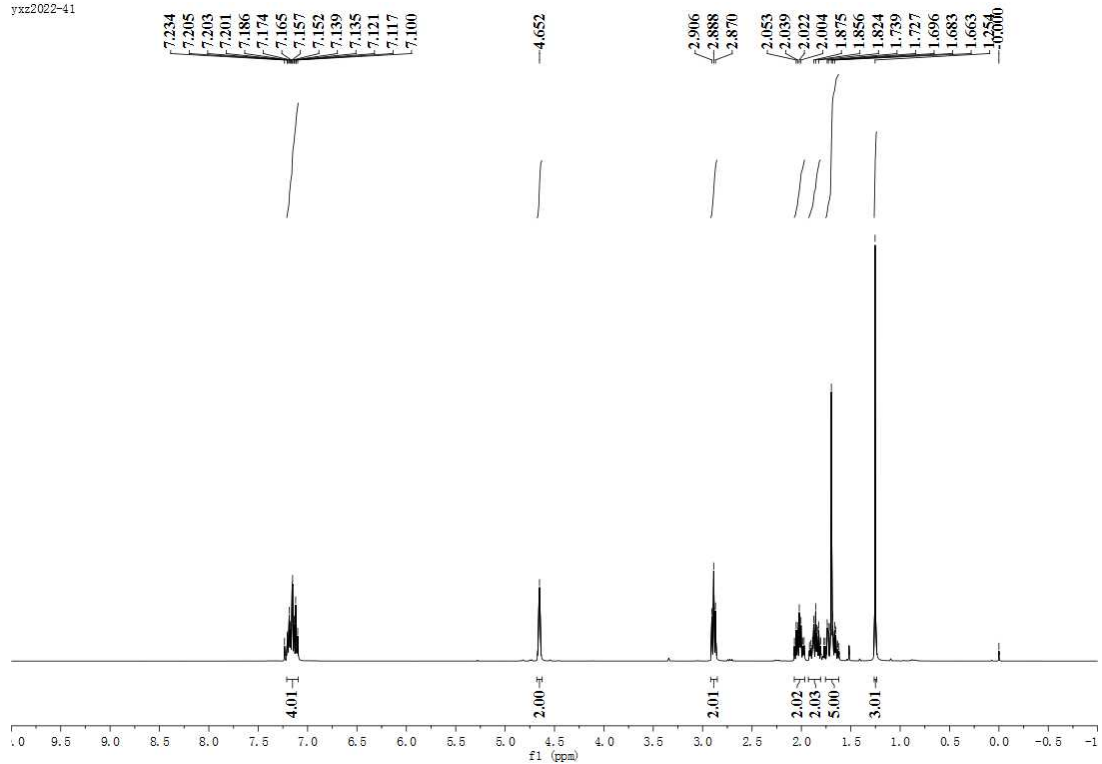

yxz2022-41

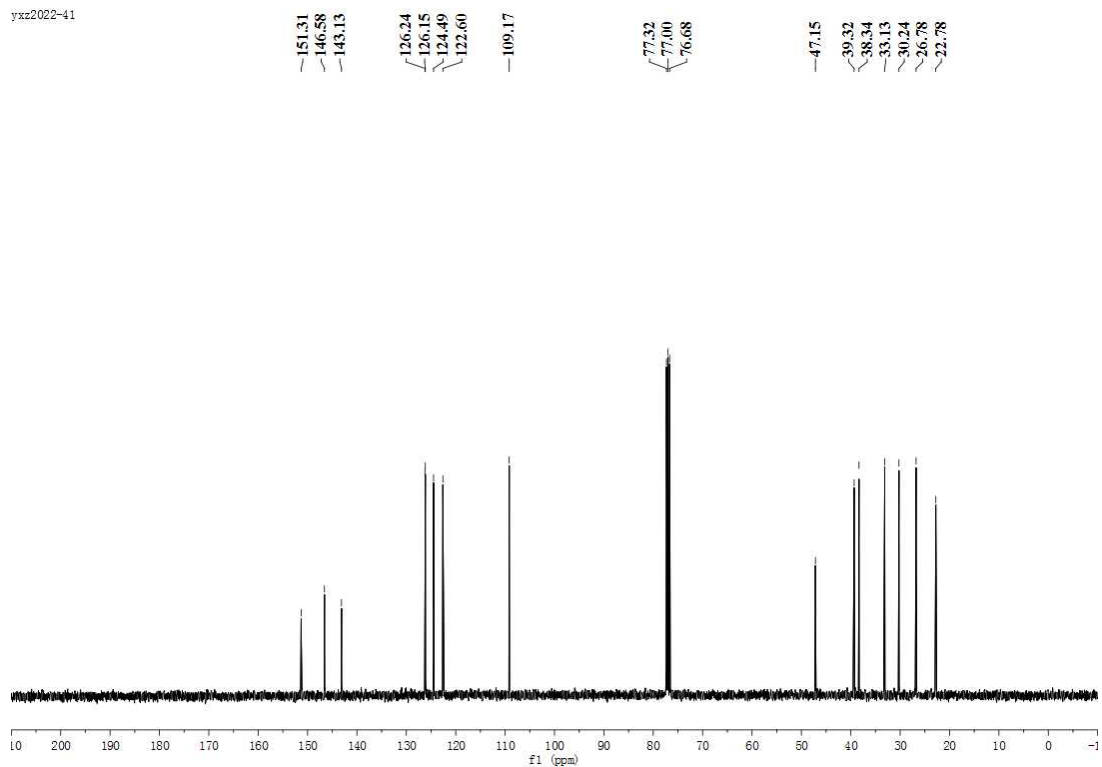

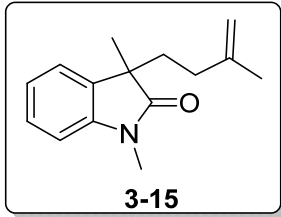

cw2022-1

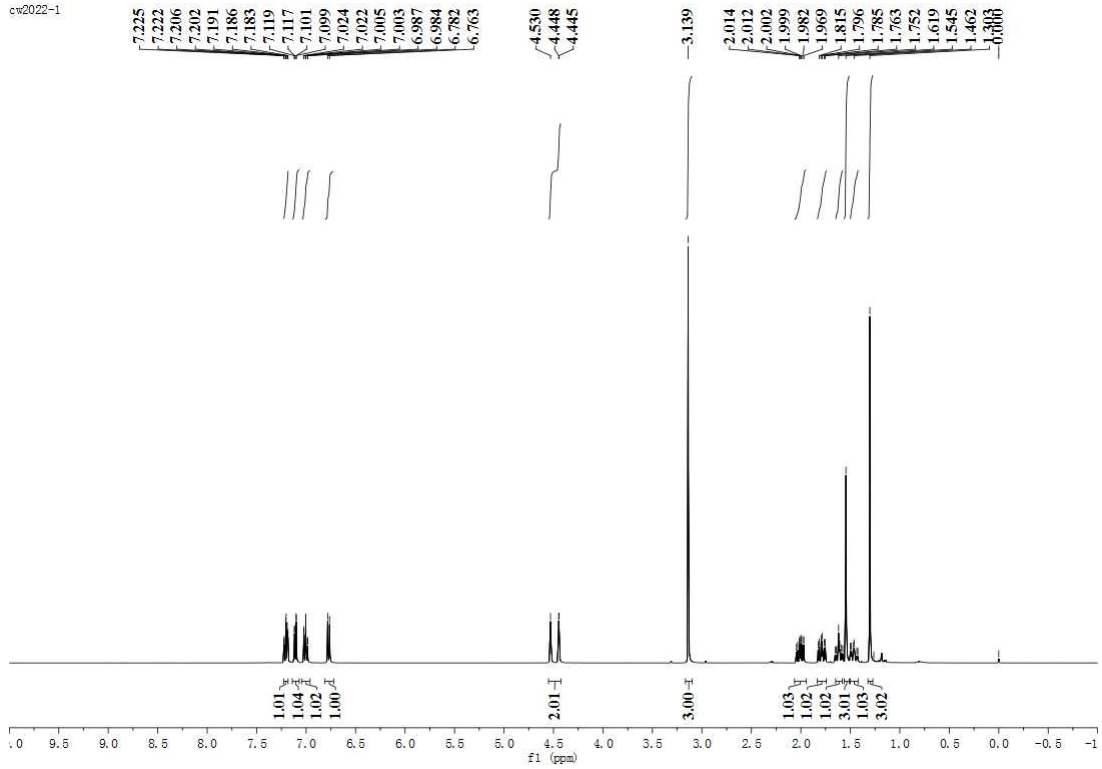

yxz2022-16

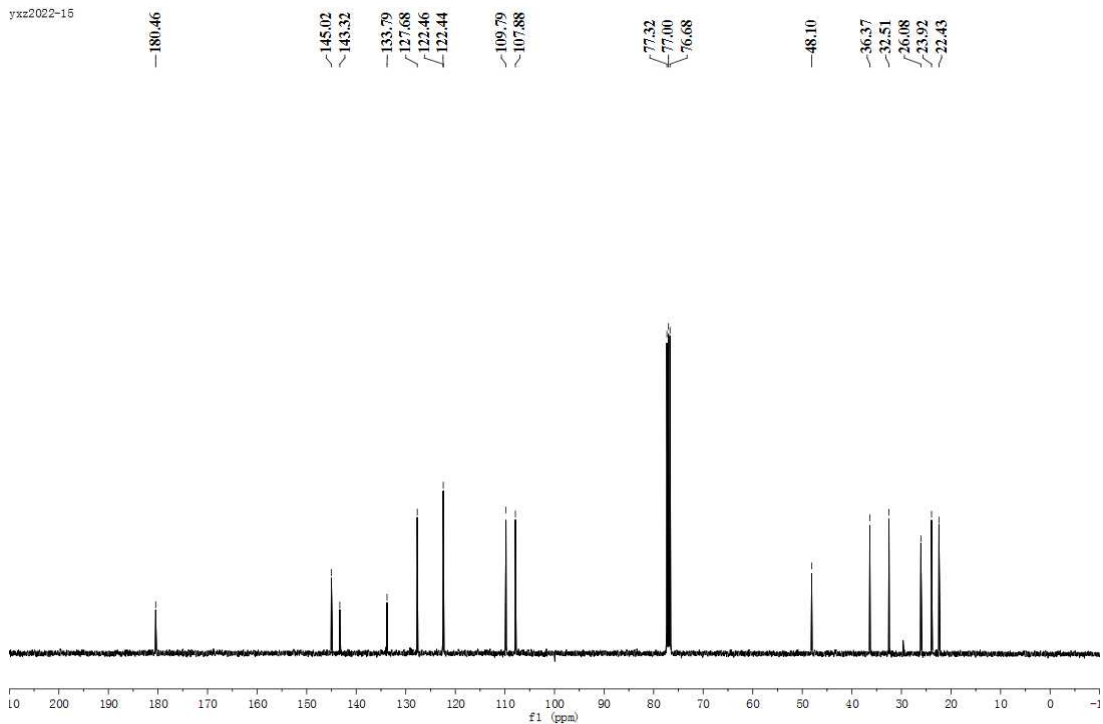

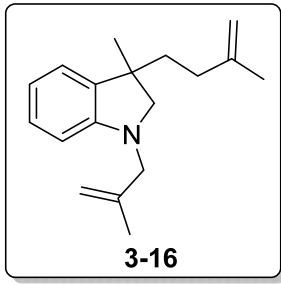

cw2022-43

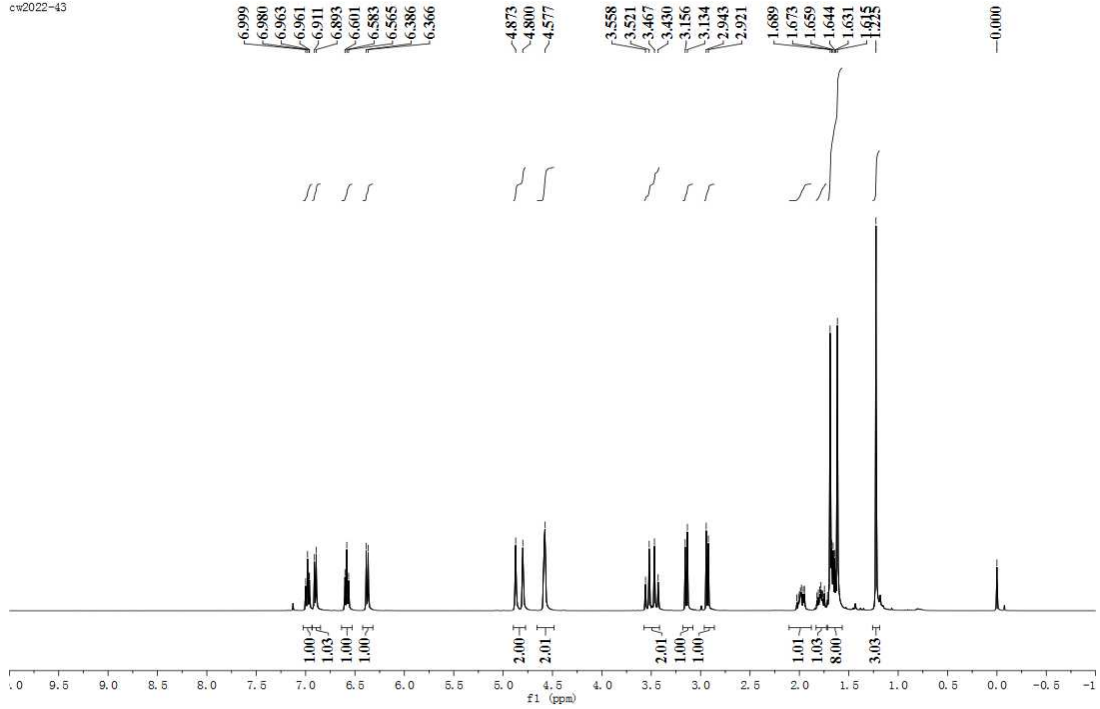

cw2022-43

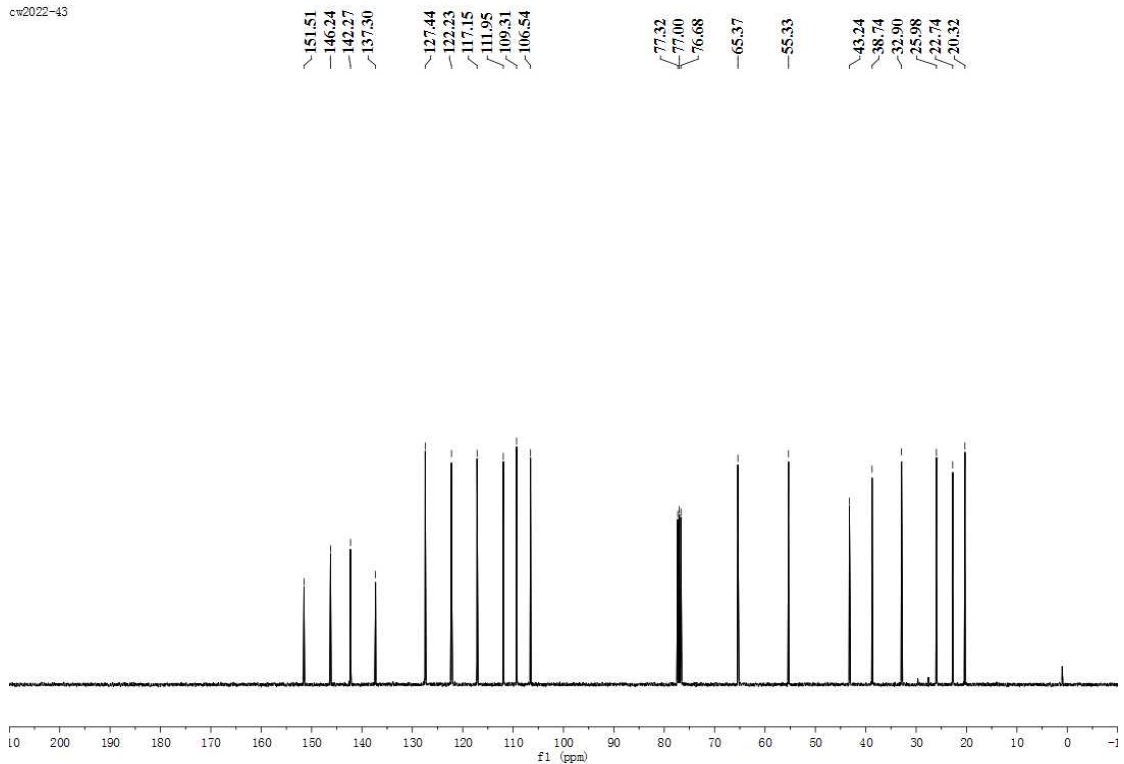

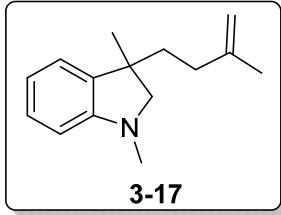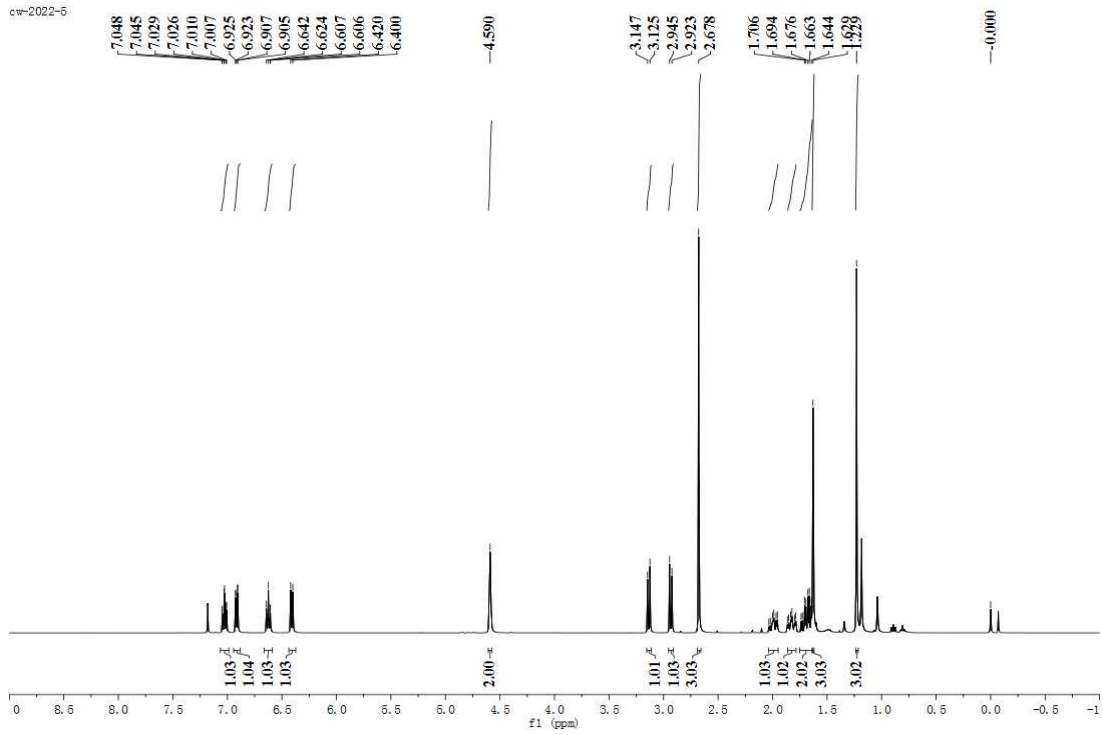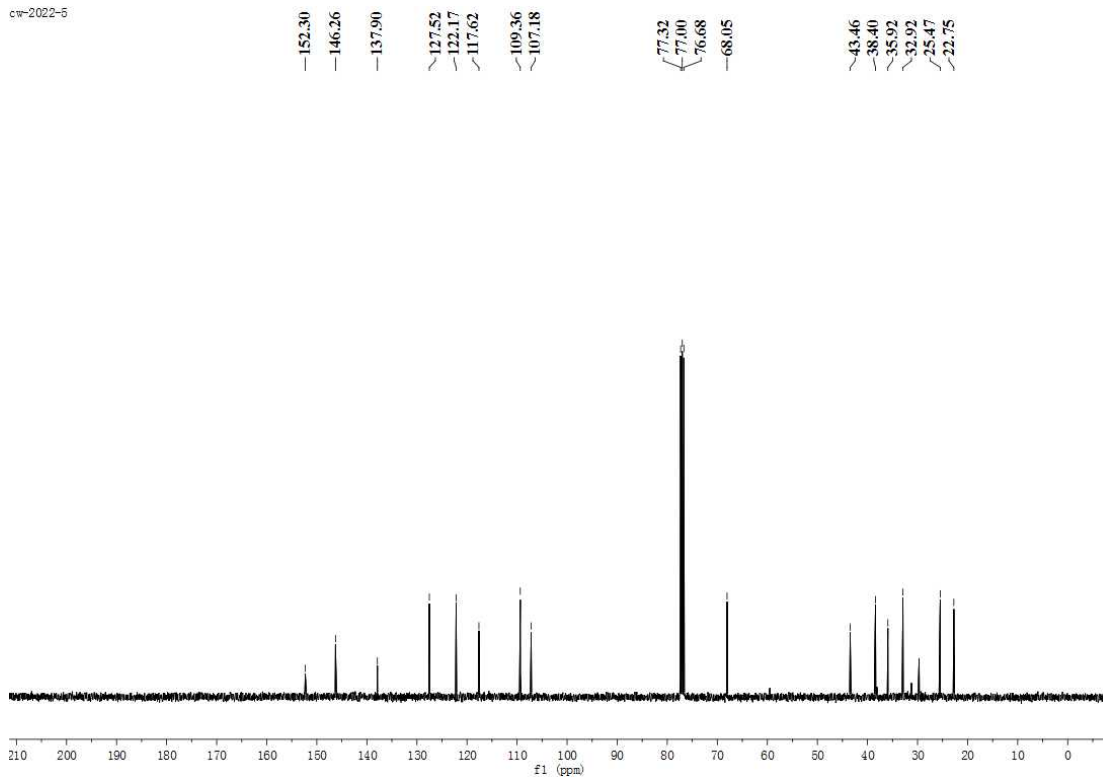

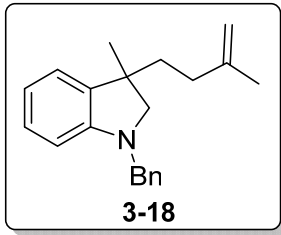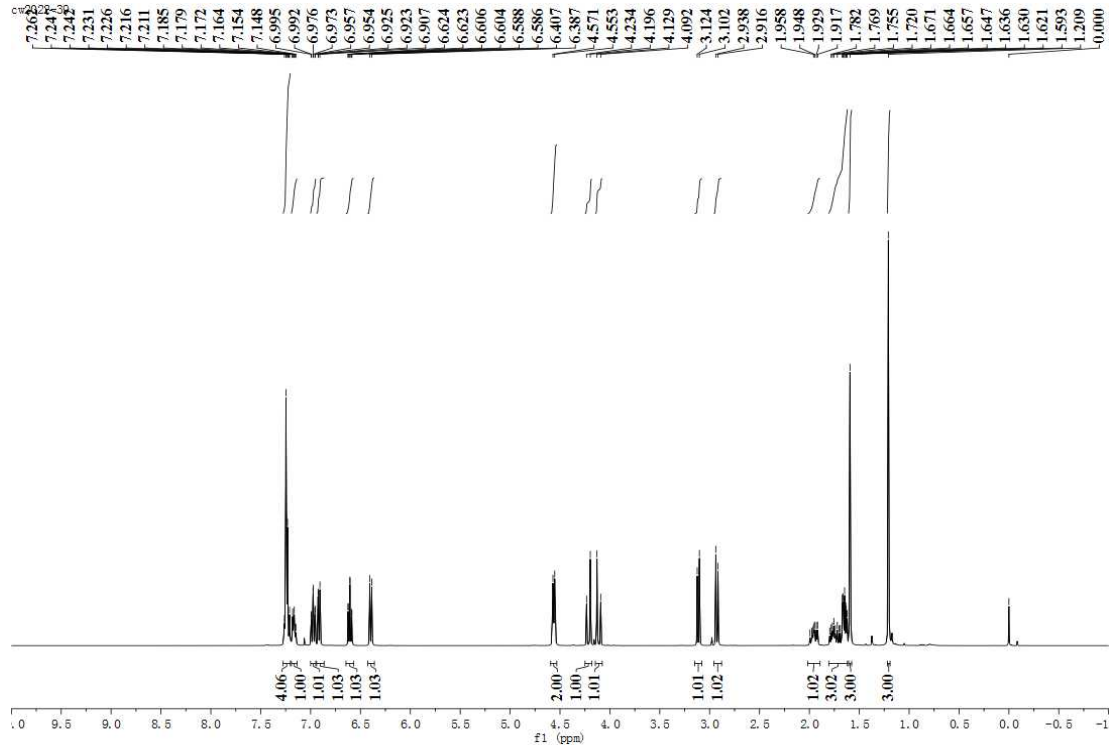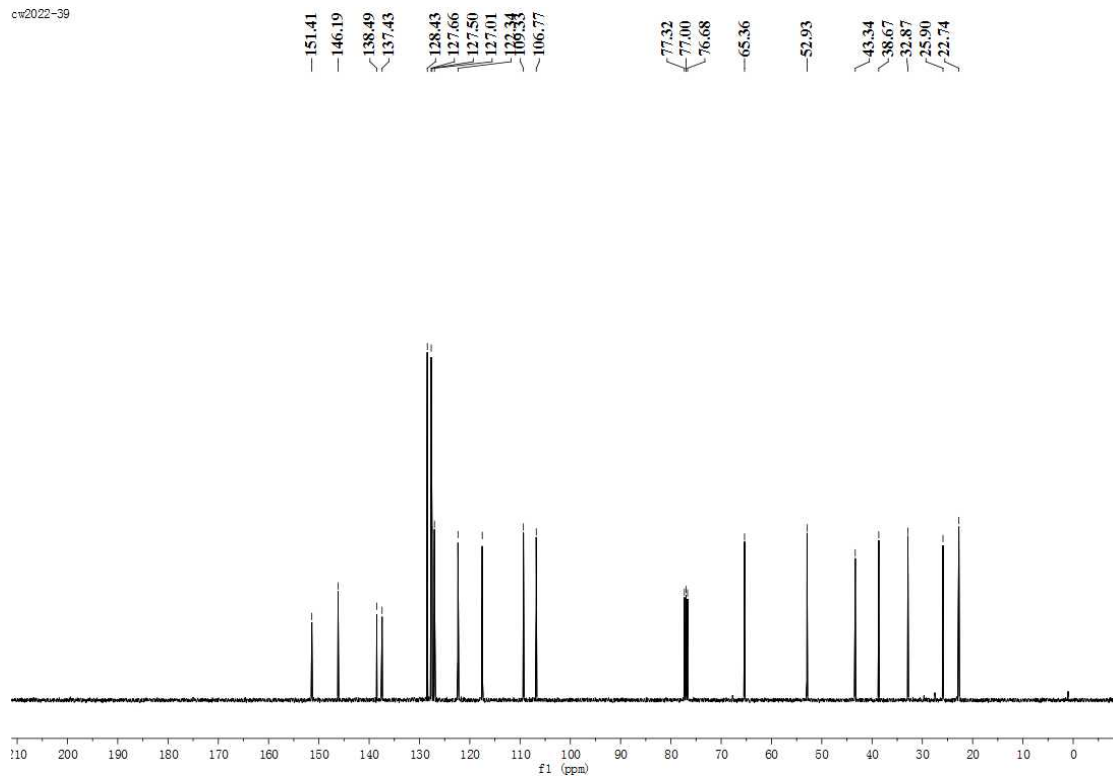

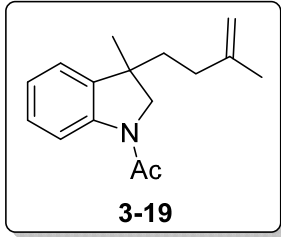

cw2022-34

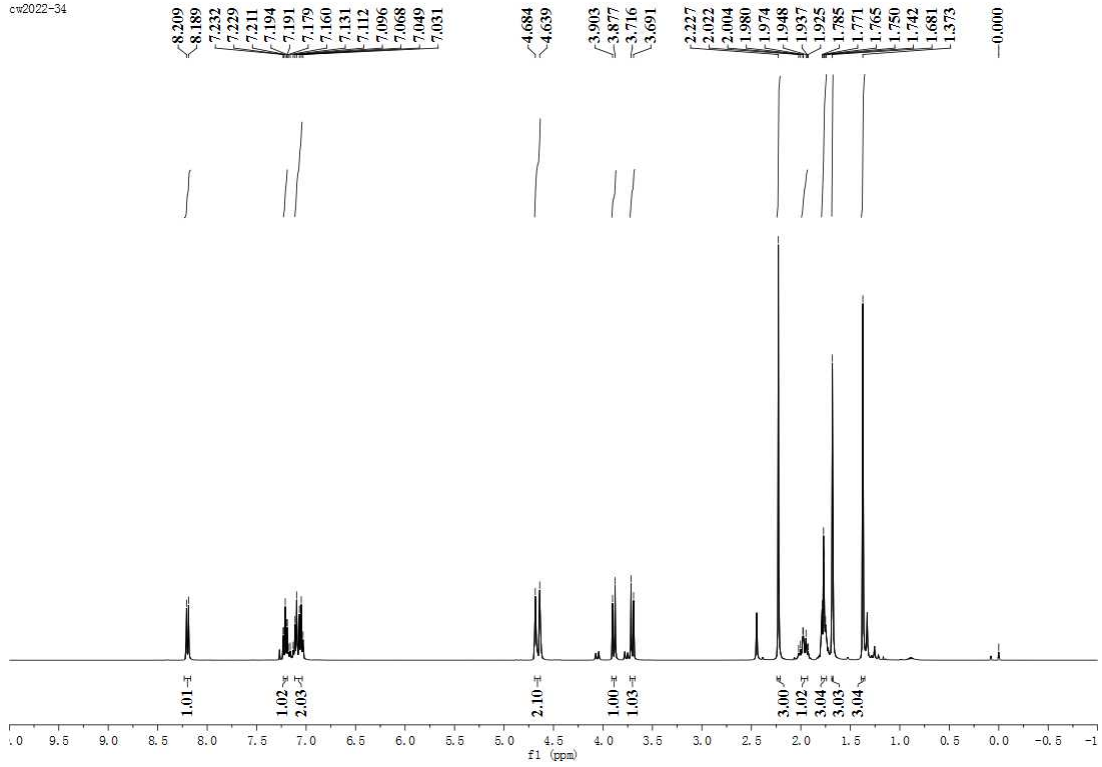

cw2022-34

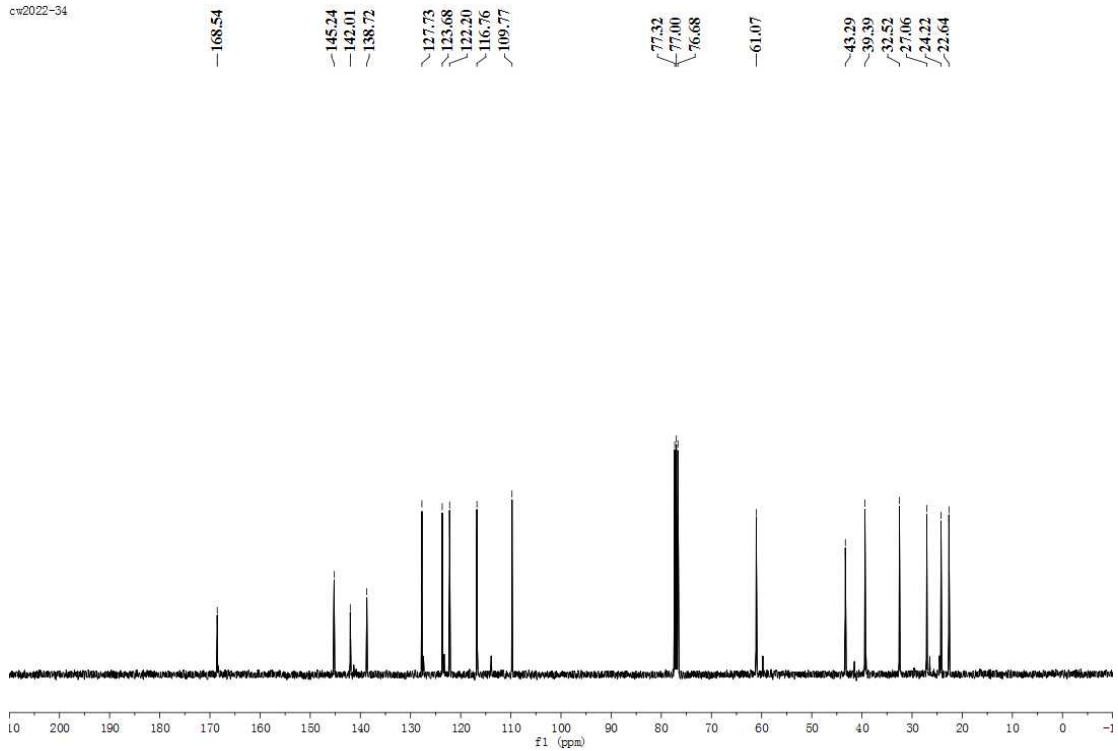



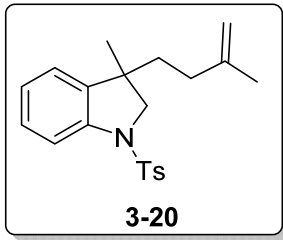

cw2022-2

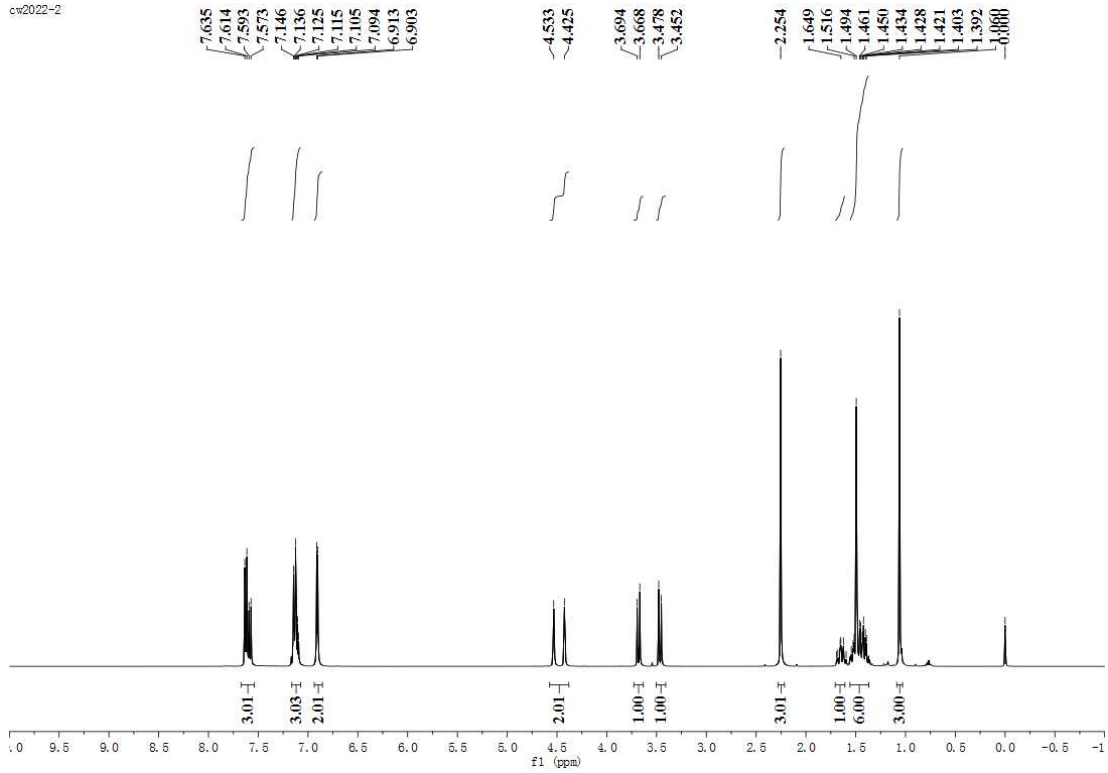

cw2022-2

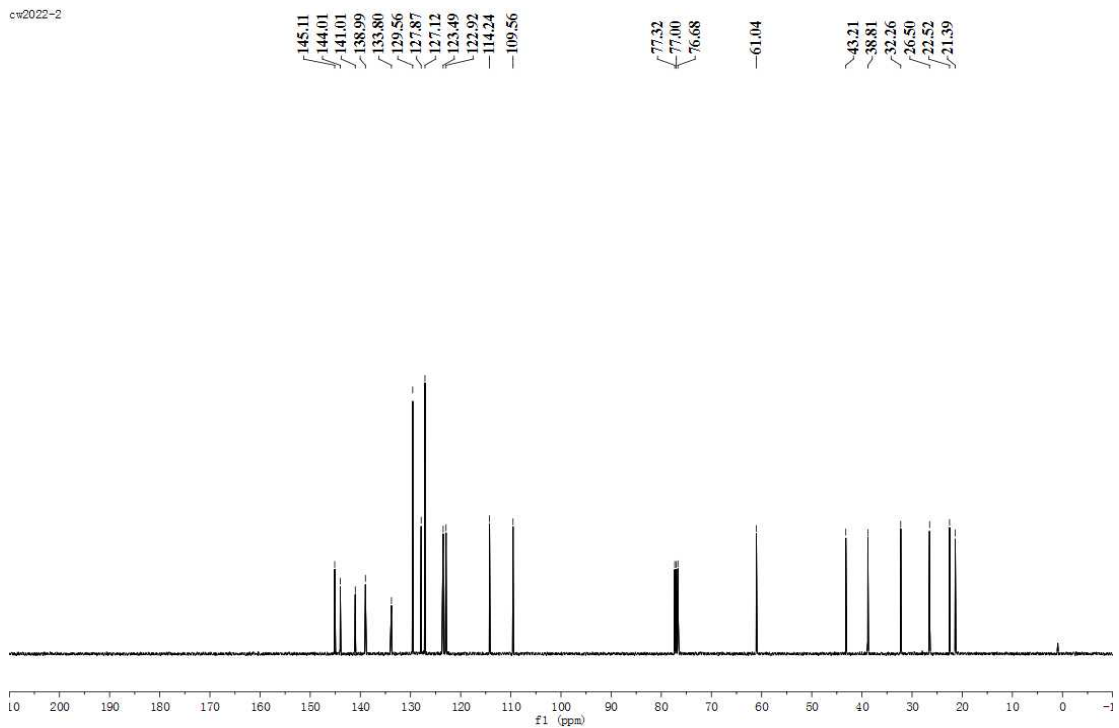

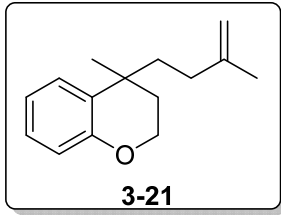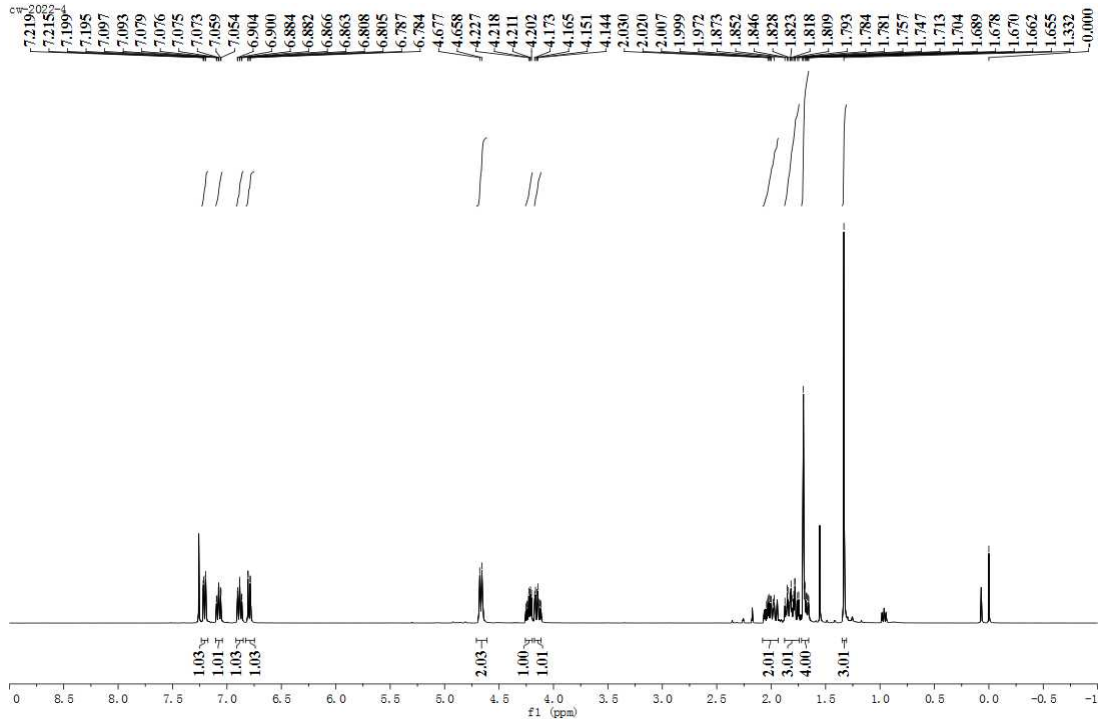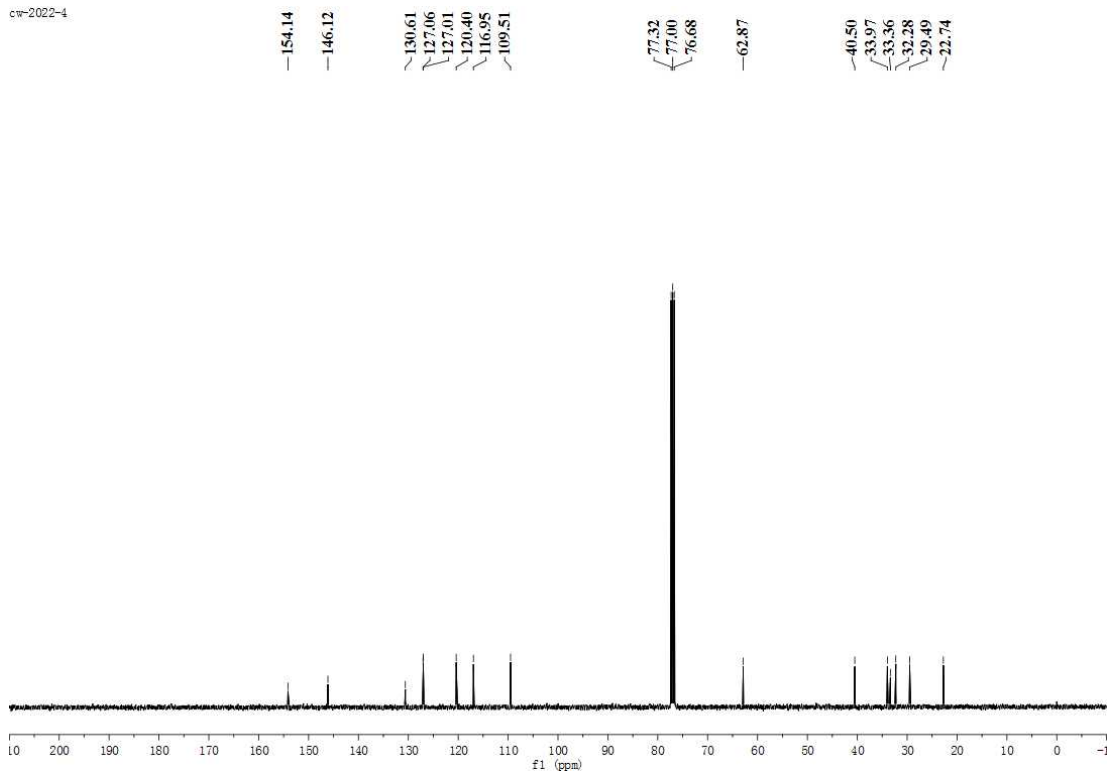

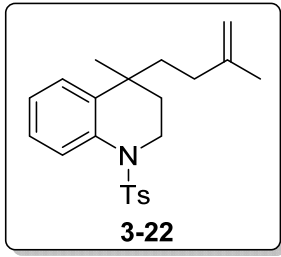

cw2022-27

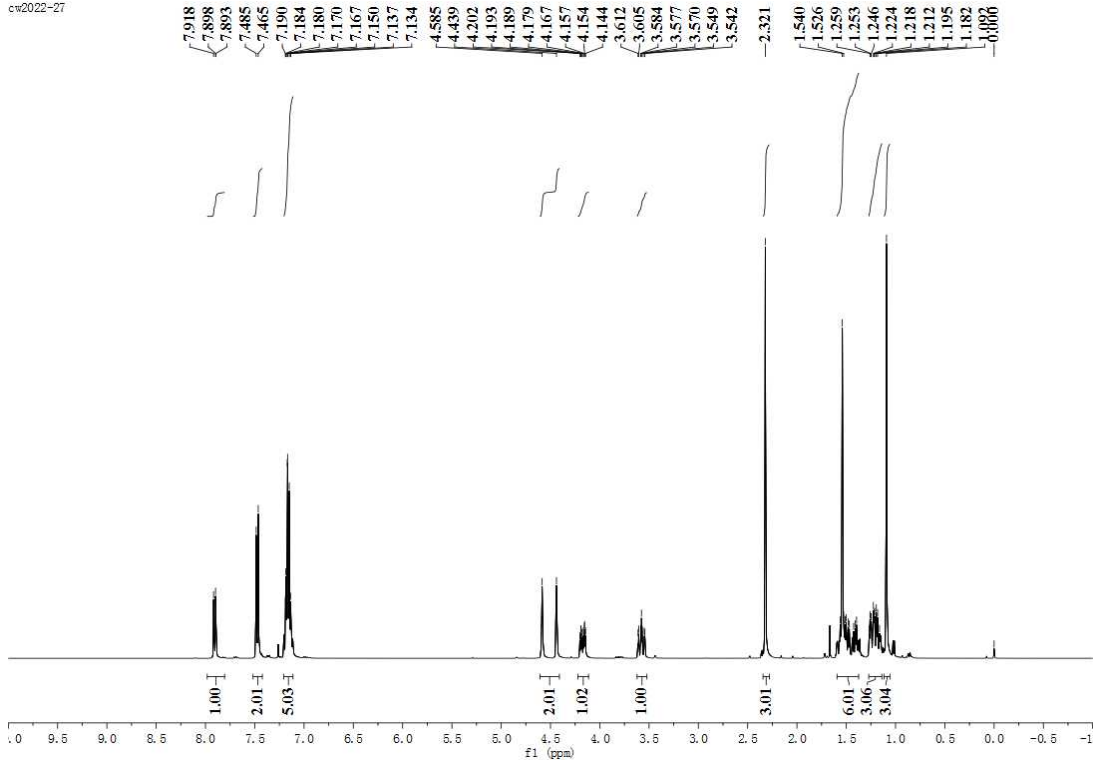

cw2022-27

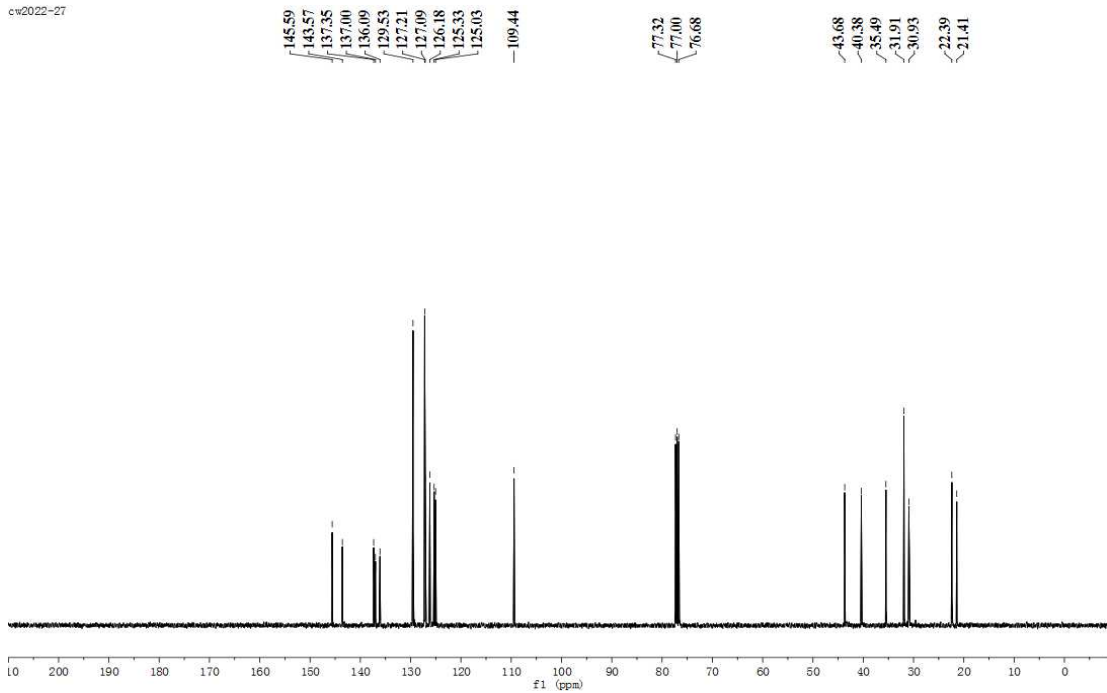

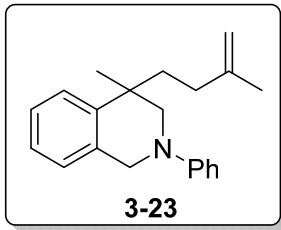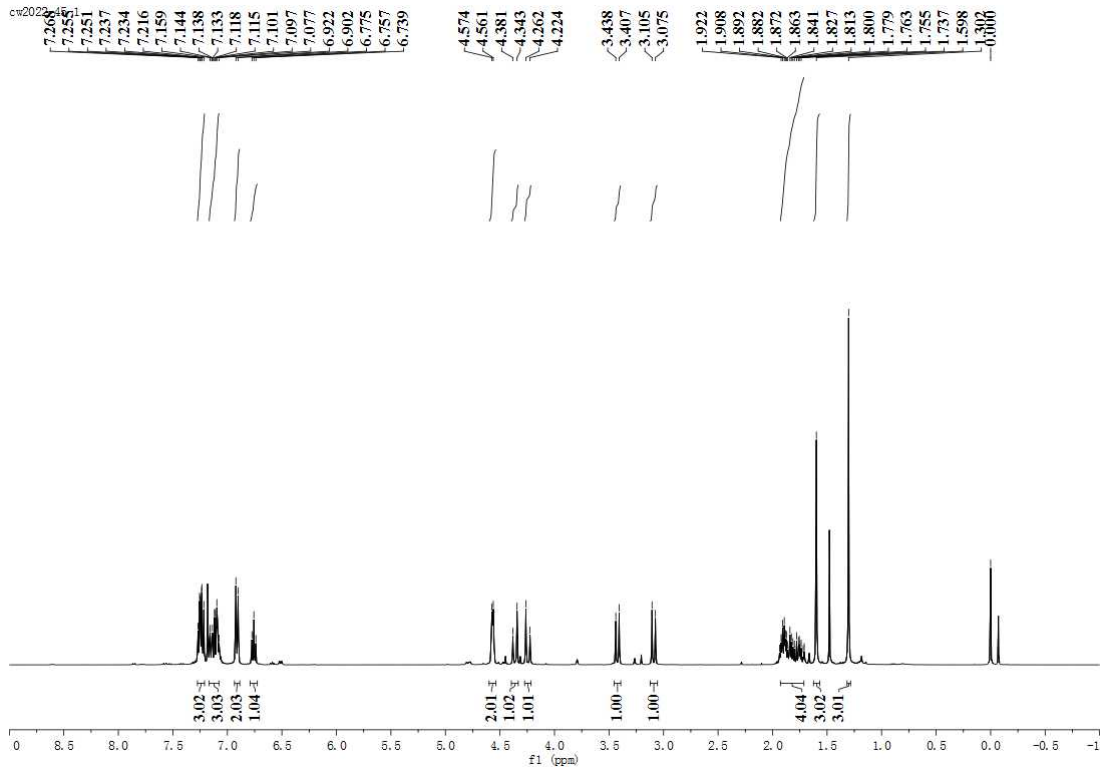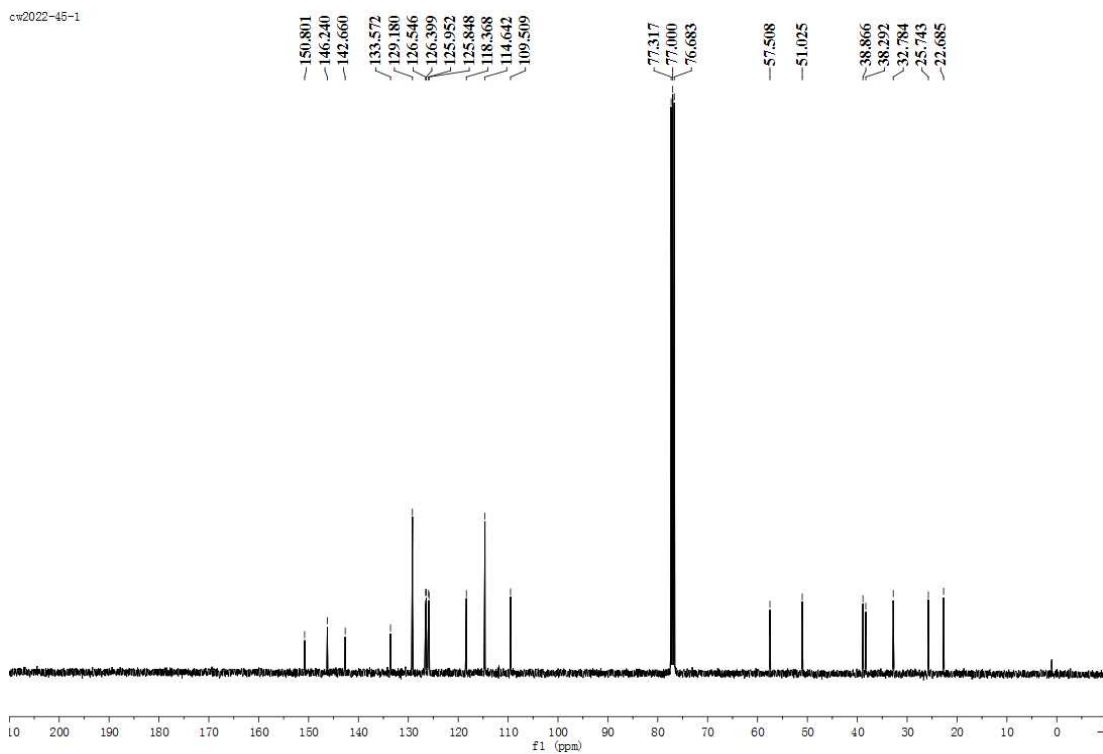

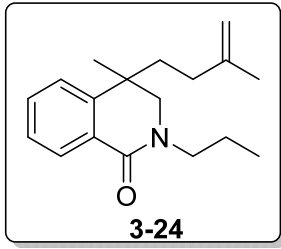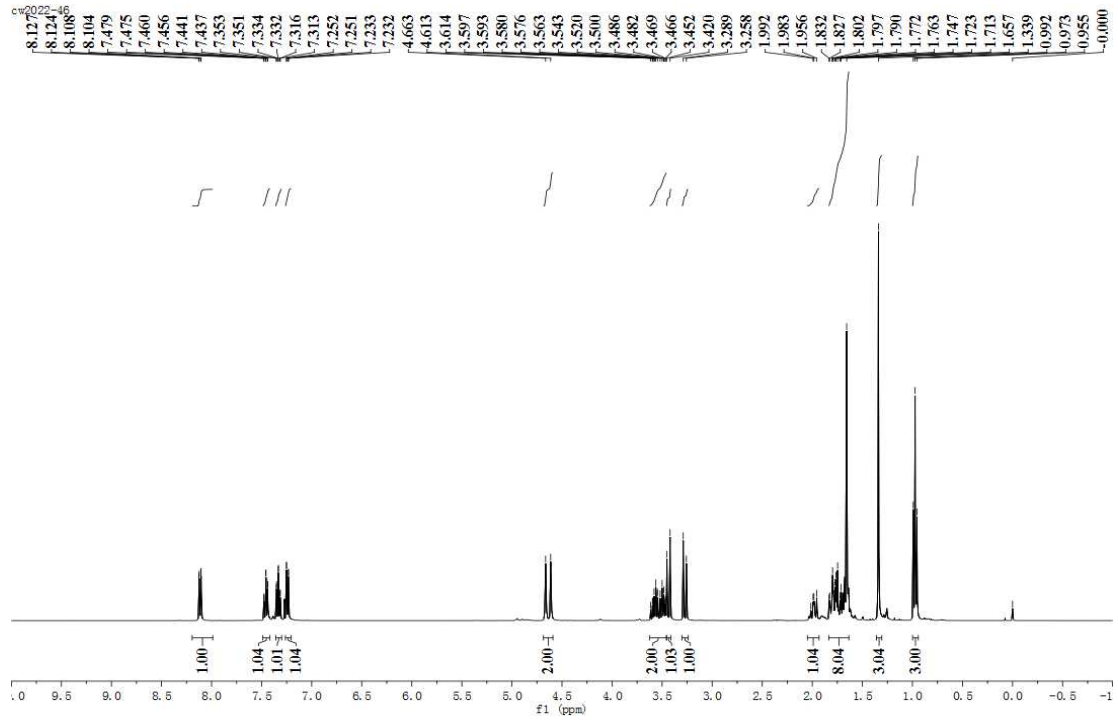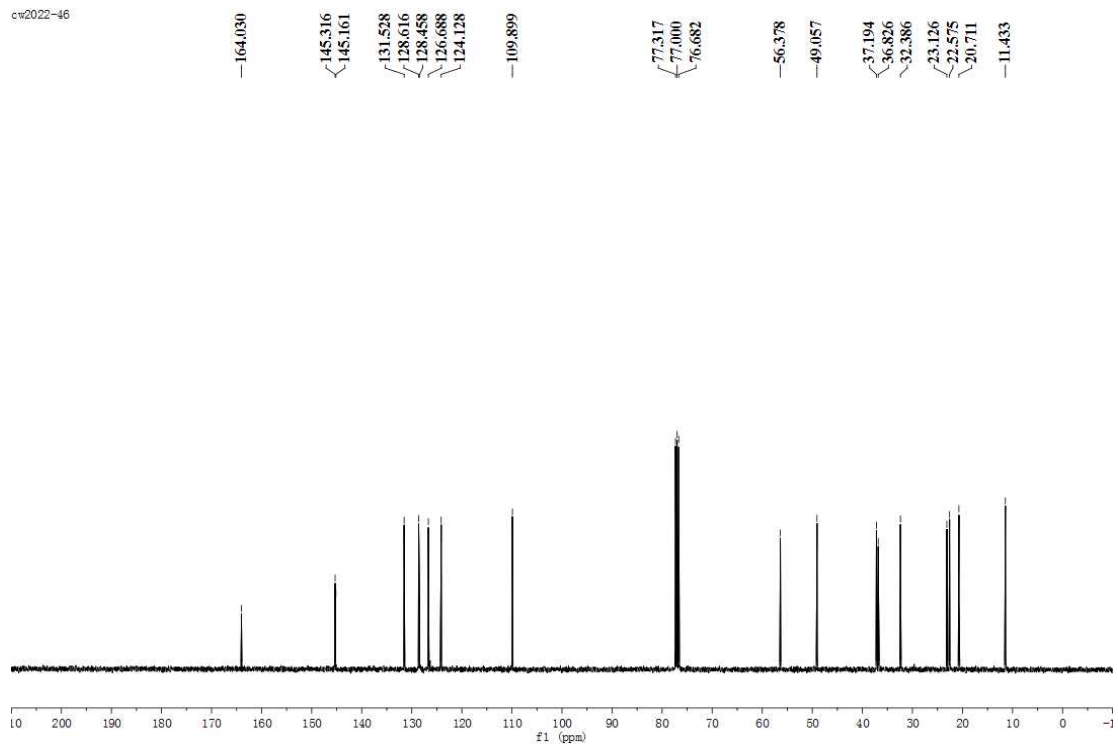

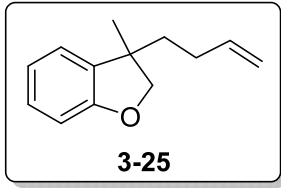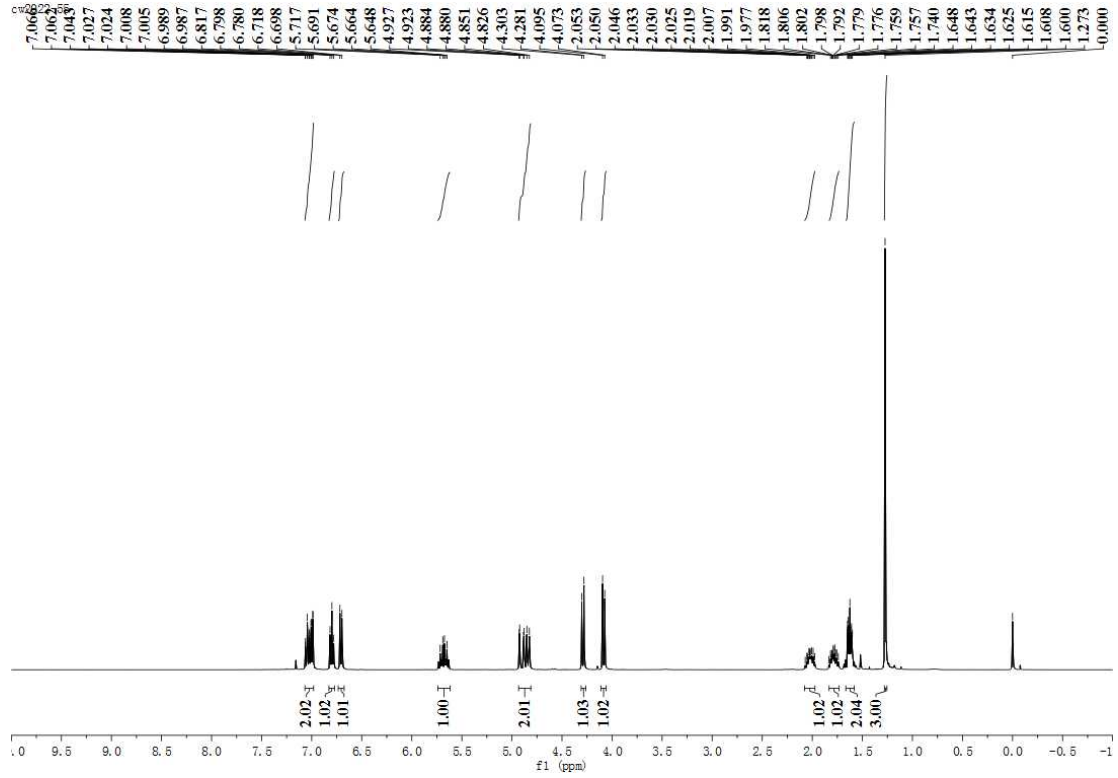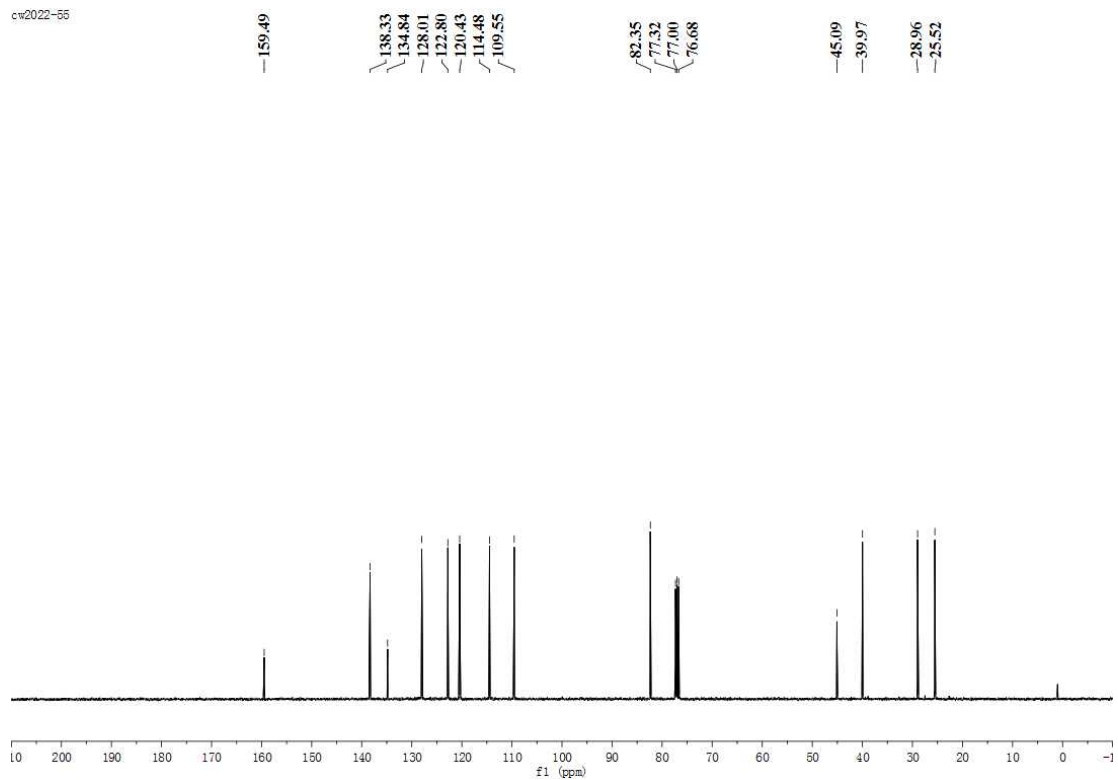

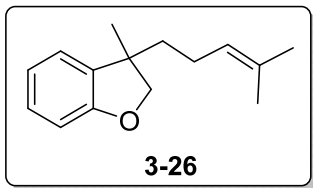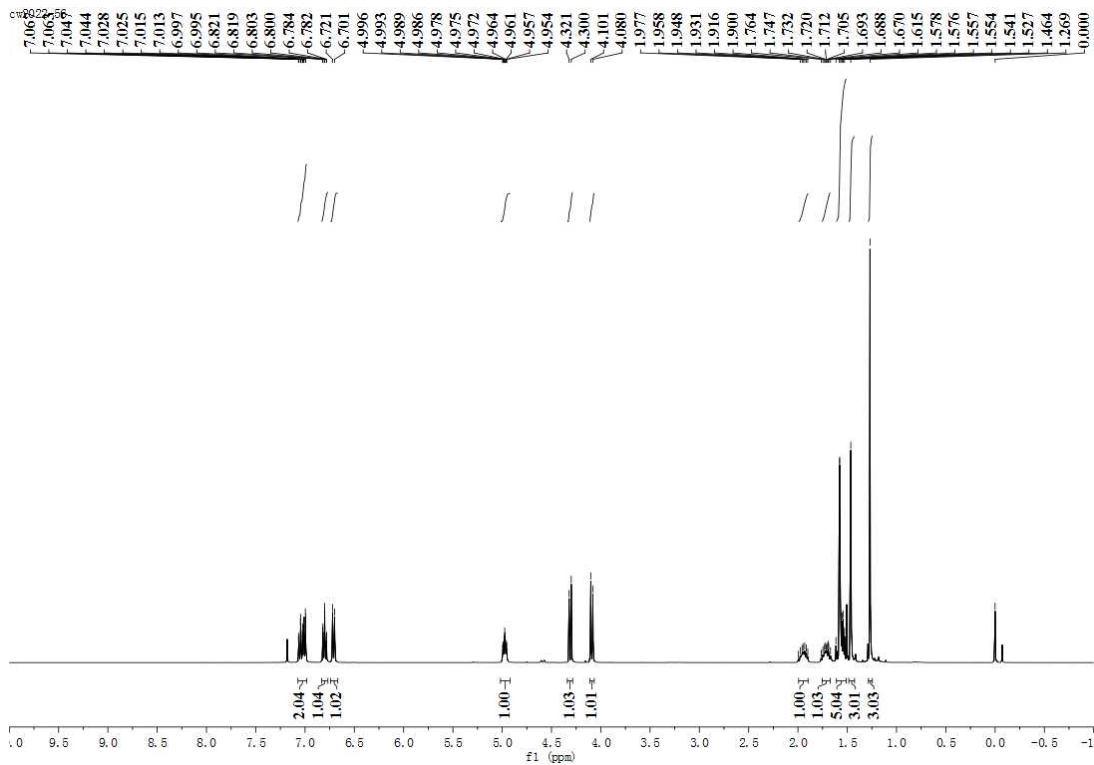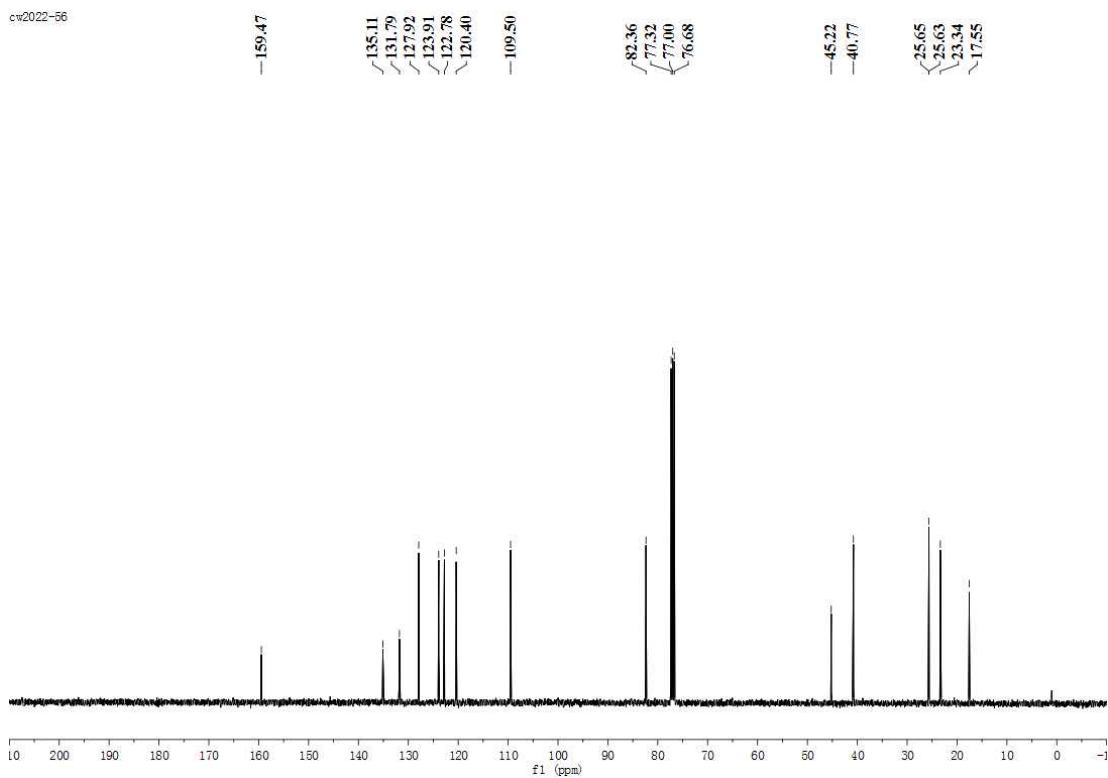

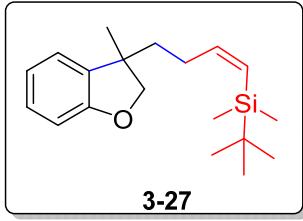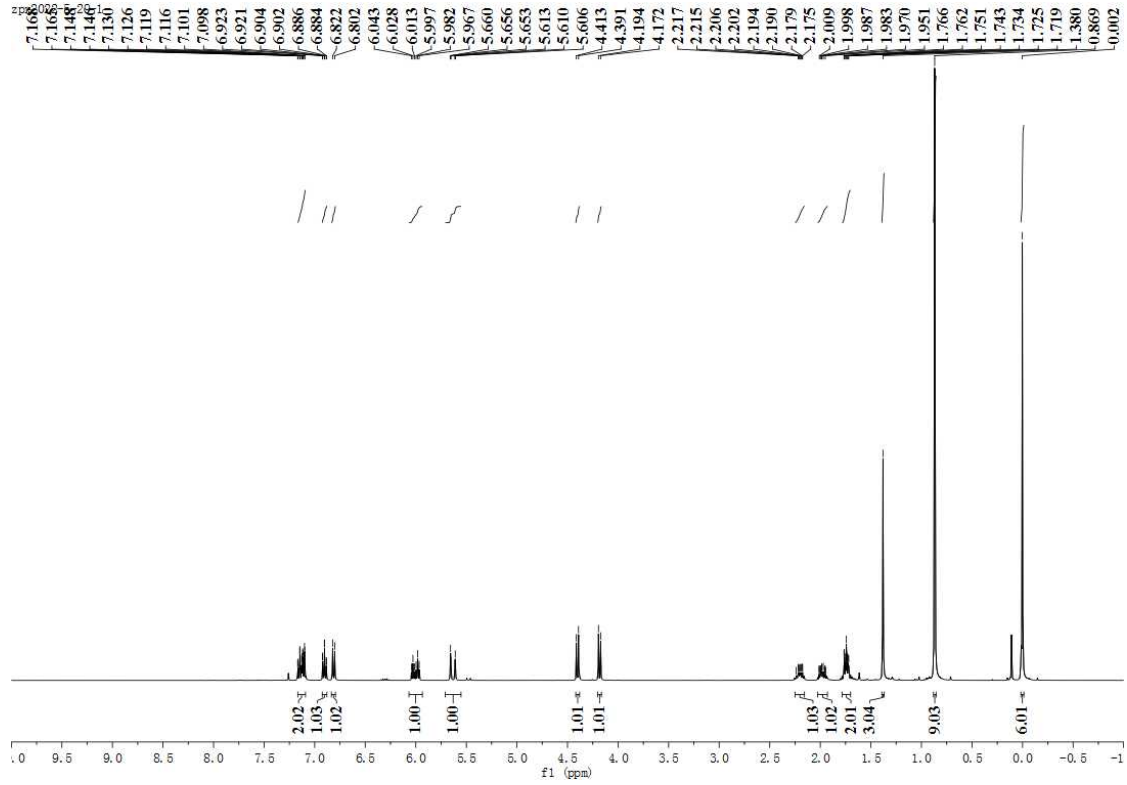

Jun14-2022-yxz2022-1

Chemical shift labels (ppm): -159.54, -147.70, -134.95, -128.01, -127.05, -122.82, -120.44, -109.57, 82.40, 77.21, 77.00, 76.79, 45.13, 39.95, 32.07, 26.41, 25.48, -16.43, -6.11.

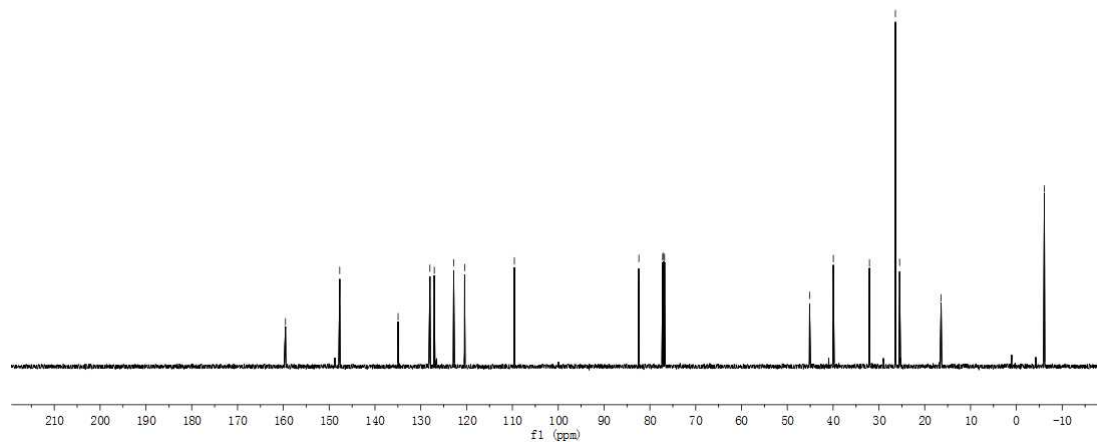



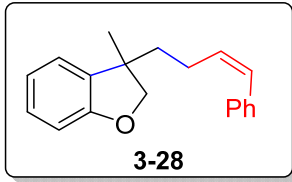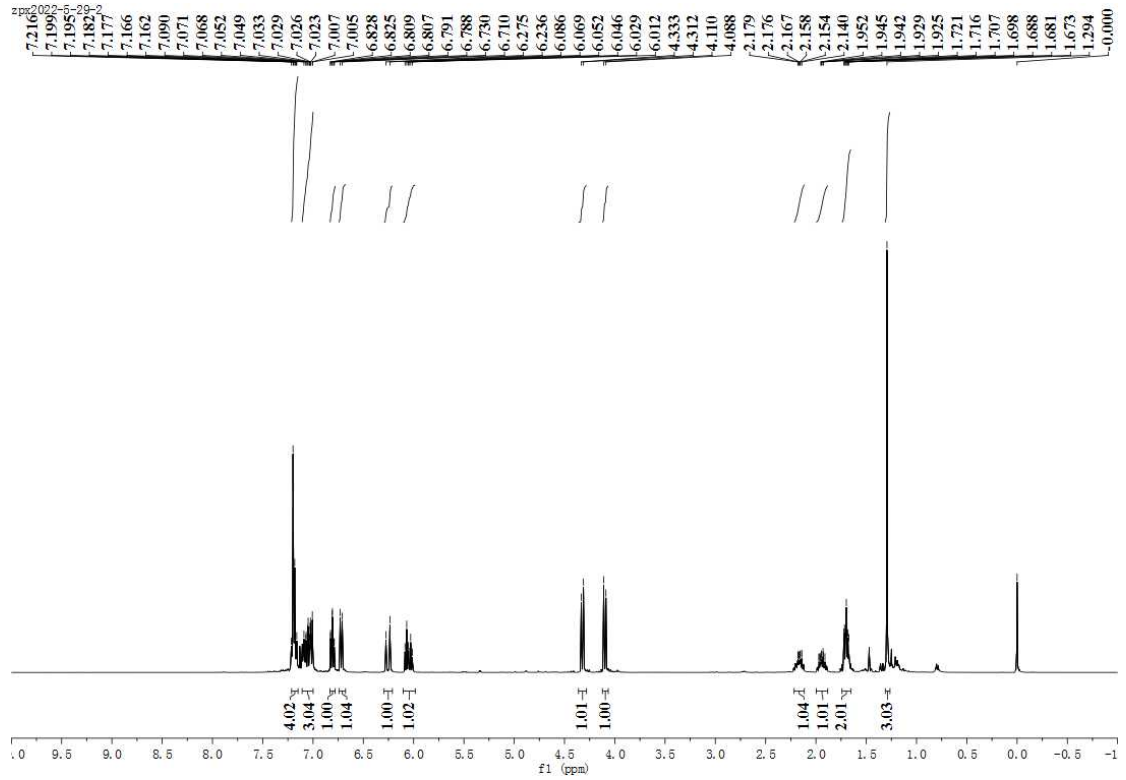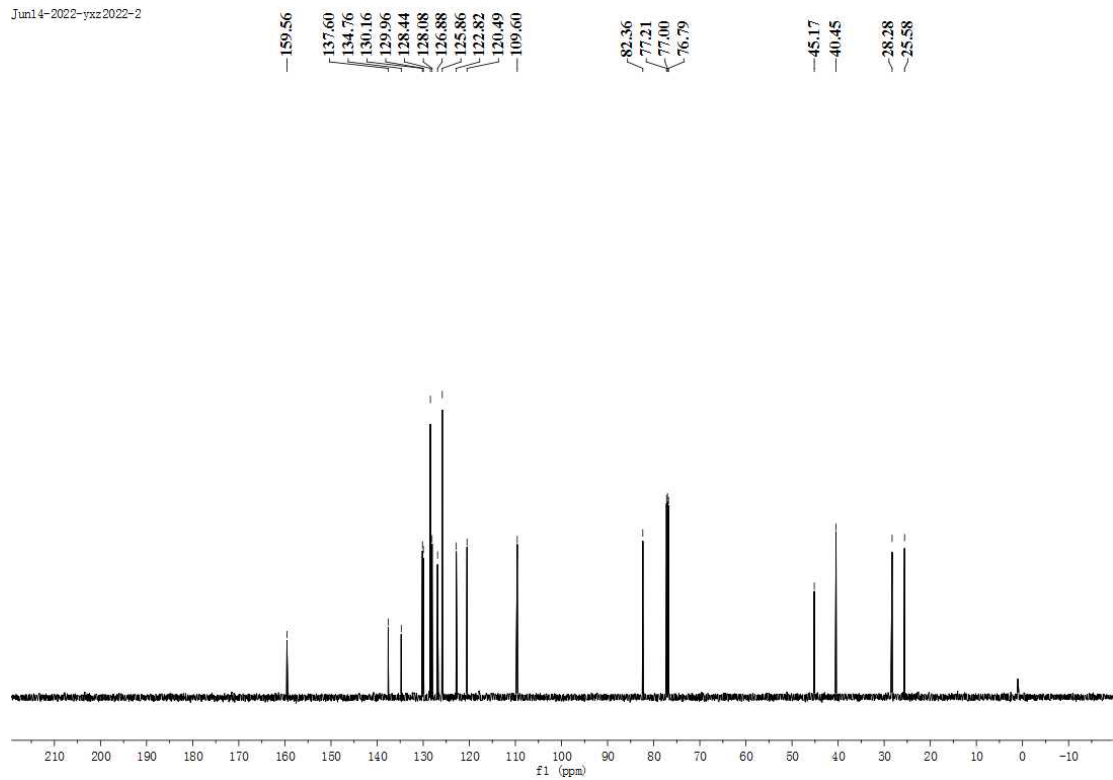

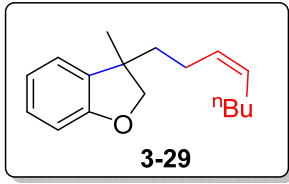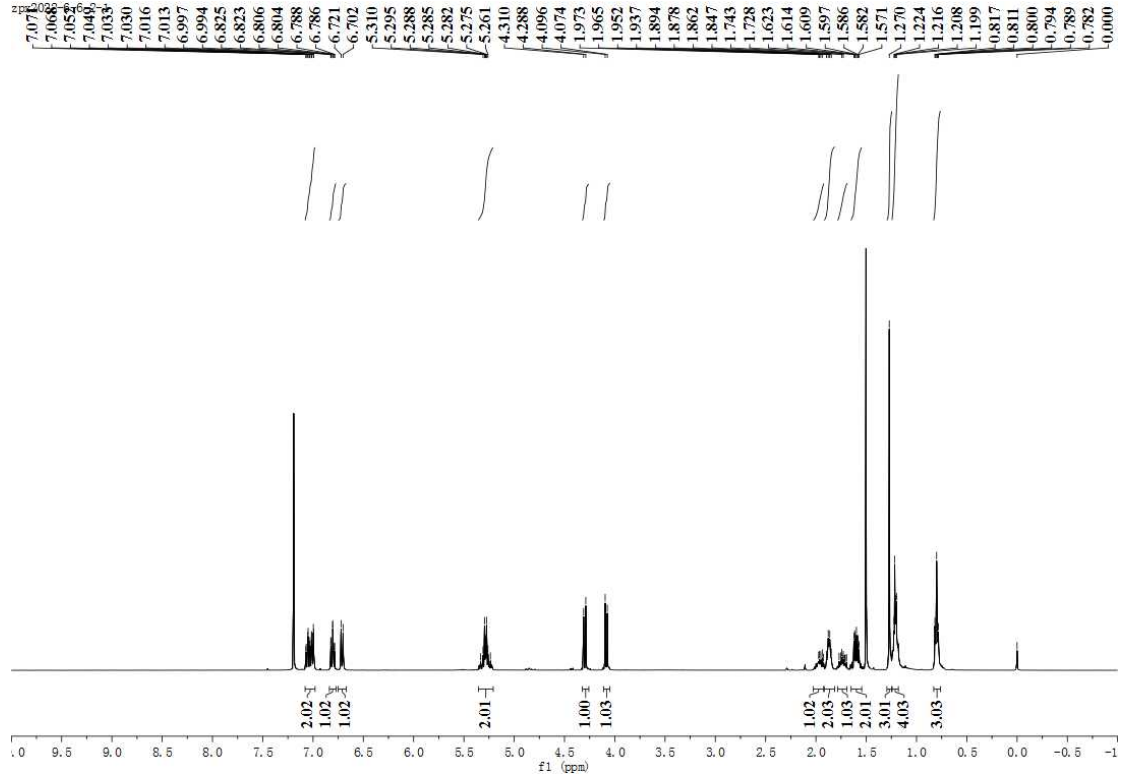

Jun14-2022-yxz2022-3

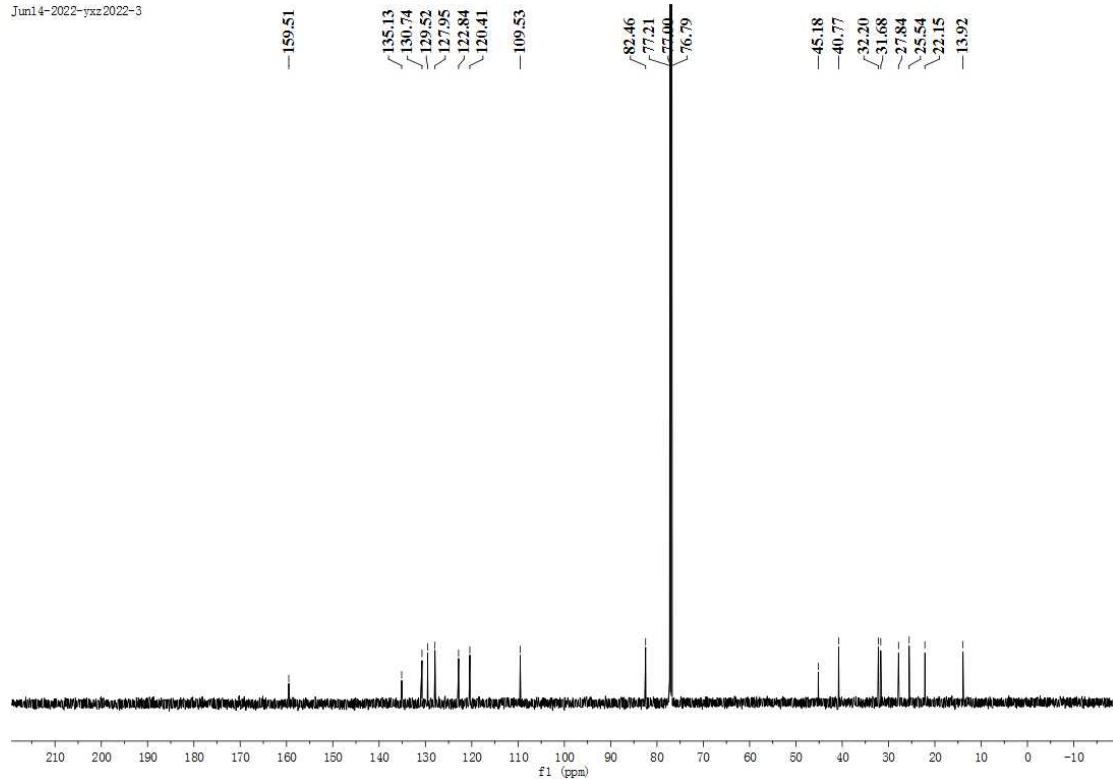

Supplement: d2qo00655c1.pdf [file d2qo00655c1.pdf]
